1 **All is fish that comes to the net: metabarcoding for rapid fisheries catch**

2 **assessment**

3

4 **Running head: Metabarcoding for fisheries catch assessment**

5

6 **Tommaso Russo<sup>\$1</sup>, Giulia Maiello<sup>\$1</sup>, Lorenzo Talarico<sup>\$1</sup>, Charles Baillie<sup>2</sup>, Giuliano Colosimo<sup>3</sup>,**

7 **Lorenzo D'Andrea<sup>1</sup>, Federico Di Maio<sup>4</sup>, Fabio Fiorentino<sup>4</sup>, Simone Franceschini<sup>1</sup>, Germana**

8 **Garofalo<sup>4</sup>, Danilo Scannella<sup>4</sup>, Stefano Cataudella\*<sup>1</sup>, Stefano Mariani\*<sup>5</sup>**

9

10 <sup>\$</sup>These authors equally contributed to this work

11 \*These authors equally contributed to this work

12

13 <sup>1</sup> University of Rome Tor Vergata, Department of Biology, Rome (Italy)

14 <sup>2</sup> University of Salford, School of Environment and Life Sciences, Salford (UK)

15 <sup>3</sup> San Diego Zoo, Institute for Conservation Research, San Diego (California, USA)

16 <sup>4</sup> IRBIM CNR

17 <sup>5</sup> Liverpool John Moores University, School of Biological & Environmental Sciences, Liverpool

18 (UK)

19

20

## Abstract

21 Monitoring marine resource exploitation is a key activity in fisheries science and biodiversity  
22 conservation. Since research surveys are time-consuming and costly, fishery-dependent data (i.e.  
23 derived directly from fishing vessels) are increasingly credited with a key role in expanding the reach  
24 of ocean monitoring. Fishing vessels may be seen as widely ranging data-collecting platforms, which  
25 could act as a fleet of sentinels for monitoring marine life, in particular exploited stocks. Here, we  
26 investigate the possibility of assessing catch composition of single hauls carried out by trawlers by  
27 applying DNA metabarcoding to the “slush” collected from fishing nets just after the end of hauling  
28 operations. We assess the performance of this approach in portraying  $\beta$ -diversity and examining the  
29 quantitative relationship between species abundances in the catch and DNA amount in the slush  
30 (reads counts generated by amplicon sequencing). We demonstrate that the assemblages identified  
31 using DNA in the slush mirror those returned by visual inspection of net content and detect a strong  
32 relationship between read counts and species abundances in the catch. We therefore argue that this  
33 approach could be upscaled to serve as a powerful source of information on the structure of demersal  
34 assemblages and the impact of fisheries.

35

## Keywords

36 Marine fisheries; trawling; DNA-metabarcoding; marine biodiversity; environmental impacts;  
37 eDNA.

38

39

## Introduction

40 Monitoring exploitation of marine resources and assessing the status of marine stocks and  
41 communities are key activities in fisheries science and biodiversity conservation. Achieving effective  
42 fisheries management is increasingly important as overfishing threatens fish stocks globally, reduces  
43 biodiversity, alters ecosystem functioning and jeopardizes food security and livelihoods of hundreds  
44 of millions of people worldwide (FAO 2020). Monitoring fishing activities and their impacts rely on  
45 two main sources of information: catch data (fishery-dependent) and research surveys (fishery-  
46 independent) (Dennis et al. 2015).

47 Since fisheries are key agents of disturbance for marine ecosystems, management requires as accurate  
48 as possible data about what, where and how much of key species is caught. The lack of such reliable  
49 catch data could lead to uncertainty about stock status, impairing our perception of resource  
50 availability, and increasing the chances of overfishing.

51 The collection of fishery-dependent data is historically carried-out by logbook – which are often  
52 inaccurate (Sampson 2011) – on-board observers, or self-sampling of catch done by fishers (Kraan et  
53 al. 2013). Unfortunately, several issues often prevent exhaustive data collection on catch  
54 composition. These include: discarding of non-commercial species, vessel size, distribution and  
55 operational range of the fleet, and the fact that the analysis of catch is based on time-consuming  
56 procedures such as visual sorting, taxonomic classification, counting, measuring, weighing, and/or  
57 tissue sampling. For all these reasons, the collection of fishery-dependent data is often limited to  
58 subsets of the fleet, compromising the accuracy and representativeness of the results achieved (Vilas  
59 et al. 2019). On the other hand, fishery-independent data, which are mainly collected by scientific  
60 surveys explicitly designed to capture resource distribution and status, depend on huge operational  
61 ship-time costs (Dennis et al. 2015).

62 Overall, collection of fishery-dependent and/or -independent data is therefore complex, time-  
63 consuming and costly. Yet, our understanding of distributions of the thousands of species caught by

64 fisheries across the world's oceans remains incomplete (Seebens et al. 2016), especially in  
65 developing countries (Worm and Branch 2012, Pauly and Zeller 2016), while sustainability targets,  
66 in the face of increasing climatic instability, still require spatially and temporally accurate,  
67 widespread, and affordable monitoring approaches (Bradley et al. 2019).

68 The rise of new technologies for the collection, management and analysis of fishery-dependent data is  
69 providing a suite of possible solutions to update and modernize fisheries data collection systems and  
70 greatly expand data collection and analysis (Bradley et al. 2019, Plet-Hansen et al. 2019). In this  
71 context, DNA metabarcoding is one major innovation that is revolutionising the way we assess  
72 biological diversity, by rapidly generating vast species inventories from trace DNA retrieved from  
73 water samples (Thomsen et al. 2012, Djurhuus et al. 2018, Stat et al. 2019), sediment cores (Fonseca  
74 et al. 2010), and bulk DNA from animal organs and tissues (McInnes et al. 2017). Different  
75 environmental media (water, sediment, gastric contents, etc.) exhibit varying levels of DNA  
76 concentration, affecting sampling, laboratory and data interpretation phases (Siegenthaler et al. 2019).  
77 However, some fishing gears, such as the nets used for bottom trawling, capture and concentrate in  
78 the net cod-end a large number of specimens in a reduced water volume. Since the amount of cells  
79 and tissues in a given volume of water should be directly related to the ratio between animal  
80 abundance and volume of water, the high biomass concentration conditions generated by trawling  
81 should lead to much greater DNA concentration of target species compared to the highly diluted  
82 conditions in seawater, commonly sampled for environmental DNA studies. This “surplus” DNA  
83 effect is expected to be even greater when animals are pressed against each other and/or wounded,  
84 losing blood or other fluids, as it typically happens during fishing operations.

85 In this study, we therefore asked the following questions: 1) can the concentrated water collected  
86 from fishing nets provide a readily available DNA source? 2) can DNA metabarcoding of such  
87 collections be effectively used to reconstruct catch composition? Specifically, we extracted DNA  
88 from samples of water draining from the net cod-end, just after it was hauled on board, while  
89 suspended above the deck (Fig. 1A). This water is a naturally concentrated “slush”, containing tissue

90 and other cell material, which we hypothesized would yield DNA data reflecting species composition  
91 in the net. We used a DNA metabarcoding approach (through next-generation amplicon sequencing)  
92 to reconstruct the species composition of several hauls across different locations in the Strait of Sicily  
93 (Mediterranean Sea, [Fig. 1B](#)) and compared them directly to concurrent assessments by on-board  
94 researchers based on visual sorting and classification. Additionally, we investigated the quantitative  
95 relationship between species abundances in the catch (number and biomass of individuals) and DNA  
96 amount in the slush (read counts generated by amplicon sequencing), as, despite the enormous  
97 potential of metabarcoding, there still is little consensus on the extent to which reads correspond to  
98 the actual abundance of species (Lamb et al. 2019).

99 We demonstrate that the assemblages identified using DNA in the slush adequately mirror those  
100 returned by visual inspection of catch both qualitatively and quantitatively. We therefore argue that  
101 this promising approach could be upscaled to serve as a powerful source of information on the  
102 composition of demersal assemblages and fishery impact on target stocks.

## 103 **Material and Methods**

### 104 *Collection of DNA samples and catch data*

105 Samples were obtained from nine sites ([Table S1](#), [Fig. 1B](#)), between July and August 2018, during a  
106 bottom trawl survey within the Mediterranean International Trawl Survey (MEDITS) framework  
107 (Bertrand et al. 2002). Sampling sites covered three depth layers (10-50m, 51-100m and 101-200m).  
108 For each site, water was collected in triplicate from the dripping net cod-end just after it was hauled  
109 on board (hereafter referred to as “slush”), while suspended above the deck ([Fig. 1A](#)), then stored in  
110 three 50 ml sterile tubes (i.e. field replicates; [Fig. 1C](#)). Contextually, to account for “baseline  
111 environmental DNA contamination”, seawater was sampled nearby the vessel during hauling  
112 procedures in six out of nine sites (i.e. seawater blanks). All samples were first frozen at -40° C on  
113 board and successively transferred in the laboratory and stored at -20° C until DNA extraction.

114 In parallel, the species composition of each catch was determined by on-board processing of net  
115 content. All the individuals in the net were identified at the species level by visual inspection of  
116 external morphology and, if needed, analysis of meristic characters. For each species at each site we  
117 recorded the overall number of individuals and their total weight.

#### 118 ***DNA extraction, amplification, library preparation and Illumina sequencing***

119 After centrifuging the slush tubes, the supernatant was removed, and 500µl of slush pellet was  
120 collected, 100µl at a time, and lysed for two hours in a ThermoMixer (Eppendorf) at 50°C and 1500  
121 rpm, with the lysis solution from the Mu-DNA (Sellers et al. 2018) protocol for tissue. Following  
122 lysis, the rest of the protocol followed the Mu-DNA water protocol. Using a mix of these protocols  
123 allowed for efficient lysis of a more viscous sample than water (containing many cells and  
124 organismal fluids), while also removing PCR inhibitors associated with seawater. For each slush  
125 sample, four DNA extractions were performed and extracts were pooled two by two in identical  
126 volumes to maximize DNA retrieval (Fig. 1C).

127 We targeted a ~167bp fragment of the mitochondrial 12S gene using the Teleo02 primers (Miya et al.  
128 2015, Taberlet et al. 2018), and a ~313bp fragment of the COI gene using the Leray-XT primers  
129 (Wangensteen et al. 2018). To uniquely distinguish each sample and aid in the detection of  
130 PCR/sequencing cross-contamination, each primer pair carried unique 8bp tags - the same tag for  
131 both forward and reverse primers. DNA extracts were PCR-amplified three times independently to  
132 minimize stochasticity. Each reaction (25µl) contained 16µl Amplitaq Gold Master Mix (Applied  
133 Biosystems), 0.16µl of Bovine Serum Albumin, 5.84µl of water, 2µl of purified DNA extract, and  
134 1µl of each forward and reverse primer. The cycling profile for 12S primers included polymerase  
135 activation at 95°C for 10', followed by 35 cycles of denaturation and amplification (95°C for 30",  
136 54°C for 45", 72°C for 30"), and a final elongation of 72°C for 5'. The cycling profile for COI  
137 primers included polymerase activation at 95°C for 10', followed by 35 cycles of denaturation and  
138 amplification (94°C for 1', 45°C for 1', 72°C for 1'), and a final elongation of 72°C for 5'. PCR  
139 replicates were then pooled prior to sequencing. Overall, we had six replicates per sites (a

140 combination of both field and technical replicates; [Fig. 1C](#)). Note that both field and laboratory  
141 controls (i.e. six seawater blanks, two extraction blanks and a negative PCR control for each marker)  
142 were amplified to ensure quality of procedures and to assess contaminations at each step.  
143 Amplicons were pooled and then purified with 1X paramagnetic beads (MagBio). For 12S we  
144 prepared a PCR-free, single-indexed library with the KAPA Hyper Prep Kit, following the  
145 manufacturer's instructions. The COI library was prepared using UDI (unique dual index) adapters as  
146 it was pooled with other libraries from other projects. Libraries were cleaned of adapters and  
147 quantified using qPCR. The 12S library was loaded onto an Illumina MiSeq platform, at 8pM  
148 concentration, for 2x150 paired-end sequencing. The COI library was loaded on a larger Illumina  
149 HiSeq 2500 run, alongside samples for unrelated projects, at Macrogen Inc., for 2x250 paired-end  
150 sequencing.

#### 151 *Data pre-processing*

152 Bioinformatic procedures for quality check and data pre-processing consisted of the following steps  
153 implemented in OBITools packages (Boyer et al. 2016). First, we merged paired ends reads  
154 (minimum score = 40) and de-multiplexed samples based on their individual tag, allowing for a  
155 single base mismatch error in each tag. Second, we discarded sequences with low base-call accuracy  
156 (i.e. average quality <30 Phred score), sequences out of the expected length range (i.e. 12S = 129-  
157 209bp; COI = 303-323bp), and singletons. Third, identical sequences were collapsed (de-replication)  
158 before taxonomic assignment.

#### 159 *Reference database*

160 A reference database was created for 12S and COI, separately ([Fig. 1C](#)): the former included 12S  
161 sequences of Mediterranean fish species, while the latter contained COI sequences of Mediterranean  
162 taxa targeted by bottom trawl fishery (i.e. teleosts, elasmobranchs, cephalopods and decapods).  
163 Sequences were downloaded from the NCBI nucleotide database on 9th January 2020: 3,513 and  
164 33,655 accessions were gathered for 12S and COI respectively. Note that the list of Mediterranean

165 fish species (N=755) is accessible in FishBase<sup>1</sup>. The list of cephalopods and decapods (N=384) was  
166 obtained combining lists from SeaLifeBase<sup>2</sup> and the Italian Society of Marine Biology checklists.

### 167 *Molecular taxonomic identification*

168 We performed the taxonomic assignment of sequences that passed the previous filtering steps: unique  
169 sequences were compared to custom-made reference databases using the megaBLAST alignment  
170 algorithm implemented in the R-package rBLAST. For each query, the best match was chosen  
171 according to the maximum (bit) score. The use of such customized database i) allowed the automatic  
172 removal of non-target taxa (e.g. DNA of humans, chicken, cow) which are frequently found in such  
173 experiments due to contamination (Taberlet et al. 2018); ii) mitigated erroneous taxonomic  
174 assignments (e.g. assignment to non-Mediterranean species), which may occur when barcode  
175 sequences of a Mediterranean species are missing or shared with a non-Mediterranean species, or the  
176 barcode diversity is underrepresented compared to that of closely related exotic species. A manual  
177 inspection was performed to validate the taxonomic assignment of the more common sequences:  
178 when a sequence was shared between multiple species, we conservatively chose the one observed in  
179 catches. Only sequences showing >98% identity match combined with a >90% alignment coverage  
180 were unambiguously assigned to a species. We filtered out residual artefacts – likely originated by tag  
181 jumping (Schnell and Bohmann 2015) and/or cross-contamination – taking advantage of negative  
182 controls (i.e. six seawater blanks, two extraction blanks and a PCR negative). Specifically, the  
183 maximum frequency of reads per-species observed in negative controls (i.e. 0.11% and 0.04% for  
184 12S and COI, respectively) was assumed as the contamination threshold. Thus, species within a  
185 sample occurring with a relative abundance below such threshold were discarded. The above-  
186 mentioned procedures are summarized in the “bioinformatics” box in [Figure 1C](#).

---

<sup>1</sup> [https://www.fishbase.se/trophiceco/FishEcoList.php?ve\\_code=13](https://www.fishbase.se/trophiceco/FishEcoList.php?ve_code=13)

<sup>2</sup> [https://www.sealifebase.ca/speciesgroup/index.php?group=mollusks&c\\_code=380&action=list](https://www.sealifebase.ca/speciesgroup/index.php?group=mollusks&c_code=380&action=list)  
;  
[https://www.sealifebase.ca/speciesgroup/index.php?group=crustaceans&c\\_code=380&action=list](https://www.sealifebase.ca/speciesgroup/index.php?group=crustaceans&c_code=380&action=list)



187 ***Qualitative comparison between catch and metabarcoding***

188 To effectively compare between overall compositions of slush (data from 12S and COI were  
189 qualitatively combined together) and catch data, we drew Venn diagrams for each taxon (teleosts,  
190 elasmobranchs, cephalopods and decapods) at both species and family level. Secondly, we used non-  
191 metric multidimensional scaling (NMDS) based on Jaccard distances to assess and visualize  
192 qualitative differences in species assemblages among sampling sites and sources (i.e. visual catch  
193 examination vs. slush metabarcoding) simultaneously. NMDS was implemented in the R-package  
194 “vegan” (Oksanen et al. 2018) and performed twice including: 1) all detected species; 2) only species  
195 shared between slush and catch. In both cases, we combined COI and 12S data and replicates were  
196 treated separately.

197 Finally, we formally tested differences between samples, considering their source (slush or catch) as a  
198 factor of the analysis together with sampling sites, with PERMANOVA (1,000 permutations) using  
199 the vegan function “adonis”.

200 ***Quantitative relationship between catch composition and number of DNA reads***

201 We summed read counts from six replicates per species and site, for 12S and COI separately.  
202 Summed reads were used to investigate the quantitative relationship with catch composition, along  
203 with environmental and “taxonomic” variables, by fitting the following model:

204  $\log(\text{Reads}_{s,i} + 1) \sim \log(N_{s,i} + 1) + \log(W_{s,i} + 1) + \text{Bathymetry}_i + \text{Family}_s$

205 Where  $\text{Reads}_{s,i}$  is the number of reads for the species  $s$  at site  $i$ ,  $N_{s,i}$  is the number of individuals of  
206 species  $s$  at site  $i$  (from catch data),  $W_{s,i}$  is the weight of species  $s$  at site  $i$  (from catch data),  
207  $\text{Bathymetry}_i$  is the sea bottom depth at site  $i$ , and  $\text{Family}_s$  is the taxonomic family of species  $s$ . We  
208 decided to include  $\text{Bathymetry}$  and  $\text{Family}$  variables because they both may affect the DNA amount  
209 in the slush: fishes caught in deeper sites may release more fluids than those caught in shallow water  
210 (e.g. because swim bladder often collapses during hauling procedure); while taxonomic groups may  
211 shed DNA differently, due to their physical features (e.g. crustaceans vs. molluscs). Given that the

212 dependent variable ( $Reads_{s,i}$ ) was clearly zero-inflated (Martin et al. 2005), we fitted a zero-inflated  
213 regression model for count data via maximum likelihood, using the function “zeroinfl” of the R-  
214 package “pscl” (Jackman et al. 2020). This kind of modelling approach returns a two-component  
215 mixture model combining a binary outcome model (i.e. Bernoulli), devised to model the inflation of  
216 zero in the observed values, and a truncated count model (e.g. Poisson or negative binomial). Using  
217 this approach, it is possible to estimate the probability that a species is present and then, given it is  
218 present, estimate the relative mean number of individuals (Martin et al. 2005). Coefficients for the  
219 zero and count components, respectively, are returned.

220 These analyses were carried out considering only species detectable by both methods (i.e.  
221 metabarcoding and catches) to avoid that technical issues may affect the relationship (e.g. the  
222 incompleteness of reference database for taxonomic assignment). Furthermore, we removed co-  
223 absences (i.e. species missing in both slush and catches in a certain site), which would artificially  
224 improve the robustness of models. The results of this modelling exercise were represented as  
225 scatterplot overlapping a representation of the confusion matrixes generated by the comparison  
226 between expected (from catch) and observed (in the slush) number of reads per species.

## 227 **Results**

228 After bioinformatic analysis, 12S PCR products yielded 5,433,845 reads and allowed detection of 32  
229 species of teleosts and 8 elasmobranchs. From COI PCR products, we obtained 716,091 reads,  
230 returning 49 species of teleosts, 9 elasmobranchs, 14 cephalopods, and 5 crustaceans. Twenty-three  
231 teleosts and 4 elasmobranchs were shared between 12S and COI PCR products. Fifty-eight species  
232 were shared across slush and catch sampling methods (Fig. 2A). Over 30% of reads included the  
233 most important target species for Mediterranean demersal catches (Russo et al. 2019): the European  
234 hake (*Merluccius merluccius*), the two red mullets (*Mullus barbatus* and *Mullus surmuletus*), three  
235 species of sea bream (*Pagellus acarne*, *Pagellus bogaraveo*, and *Pagellus erythrinus*), and the deep-  
236 water rose shrimp (*Parapenaeus longirostris*). However, 30 species were detected only in the slush

237 and 36 only in the catch. [Figure 2B](#) shows the comparison between sampling methods at the family  
238 level.

239 Beta diversity reconstructed through different methods (DNA metabarcoding or visual inspection),  
240 showed a clear intra-sites affinity and a coherent distribution of samples according to the depth strata  
241 ([Fig. 3](#)). Both NMDS performed on the whole dataset ([Fig. 3A](#)) and on the subset of species shared  
242 across slush and catch ([Fig. 3B](#)) separated samples according to their spatial origin (habitat/biotope),  
243 with a clear depth gradient along the first dimension. Most notably, DNA data appear to convey very  
244 effectively the greater  $\alpha$ - and  $\beta$ -diversity of the mid-depth layer (stations “B”), particularly  
245 highlighted by the divergent site B5, situated in the highly biodiverse off-shore shallow of the  
246 Adventure bank (Consoli et al. 2016).

247 PERMANOVA on the whole dataset detected a significant difference between samples, with most of  
248 the variance explained by stations (69%), and only 3% contribution of source (i.e. slush or catch).  
249 [Figure 4](#) shows the zero-inflated model fits (see also [Table S2](#)), in which observed values are plotted  
250 against predicted values. The zero-inflated models for 12S and COI datasets returned good fits for  
251 both zero and count components, with a clear linear relationship between predicted and observed  
252 values when both are greater than zero.

## 253 **Discussion**

254 The idea behind this work is that fishing nets can concentrate shed material from captured species,  
255 increasing the amount of their DNA relative to the trace DNA from all the species present in the  
256 surrounding environment. Our results confirm that the water draining from trawling gear is indeed an  
257 effective source of concentrated DNA. Given that capturing sufficient quantities of DNA is one of the  
258 first critical steps in the application of eDNA-related techniques (Spens et al. 2017), and that the  
259 oceans remain largely under-surveyed, this finding opens the door to potentially important  
260 applications for fisheries and biodiversity monitoring.

261 Visual and DNA-based assessment methods (catch and slush) corroborate each other, indicating that  
262 water draining from net cod-end is a significantly good proxy for composition of commercial catch  
263 (Fig. 2A and Fig. 3A), and that important information on  $\beta$ -diversity of fishing grounds can be  
264 readily gleaned through DNA monitoring. The 30 species detected by DNA but not recovered via  
265 visual inspection reflect the power of metabarcoding approaches to identify rare and cryptic species  
266 (e.g. *R. polystigma* vs. *R. montagui*), and record taxa that are present in the environment but not  
267 catchable via trawling. Although it may appear counter-intuitive, positive detection of taxa not  
268 captured by the net can originate from a variety of processes: the physical action of the trawling gear  
269 on the substrate can suspend and retain biological material from organisms that may not be caught;  
270 this may include gametes, larvae and mucus and hence be visually undetectable in the haul;  
271 additional DNA may originate from faeces and regurgitates from the fish that are caught, and  
272 damaged, in the net. On the other hand, the 36 species that were visually identified but not detected  
273 through DNA mostly reflect the incompleteness of sequence repositories, which remains a significant  
274 challenge that must be met in the coming years in order to make DNA monitoring fully operational.  
275 This explanation is supported by the analysis at the family level, which shows a reduction of the  
276 mismatches between methods. The DNA approach appears less efficient in the case of invertebrates  
277 (crustaceans and cephalopods), and this may be partly explained by the lower sequencing depth  
278 available for COI; furthermore, as we specifically extracted DNA from centrifuged pellets (i.e.  
279 excluding the supernatant), this may have high-graded vertebrate DNA through the concentration of  
280 fish mucus.

281 Despite the complexities discussed above, we were able to unveil a robust correlation between  
282 number of sequence reads and species abundance in the catch. Previous studies had also suggested  
283 that metabarcoding data could be used to infer abundance, at least to some extent, and at a higher  
284 taxonomic level than the species (Thomsen et al. 2016). Here we showed that by adding few  
285 sampling-associated predictor variables to a regression model, it is possible to explain up to 63% of  
286 the variance in reads abundance across samples. Undoubtedly, the unnatural biomass concentration

287 achieved through trawling likely underlies the more pronounced quantitative nature of metabarcoding  
288 data compared to what is normally expected in “typical” eDNA studies based on seawater samples.  
289 This represents a promising feature of the “slush” approach, for instance, in the context of catch  
290 composition reconstruction, which may often differ from recorded landings as a consequence of by-  
291 catch discard, a widespread practice that interferes with fisheries management and has substantial  
292 consequences on some stocks and assemblages.

293 It should be stressed that scalability of DNA-based trawl assessments would be practically achievable  
294 in a context of low-tech, rapid, non-sterile sampling operations, as fishermen and observers would not  
295 have the time to carry out sampling following strict eDNA protocols; for instance, the presence of  
296 “carry-over” DNA traces from a previous haul may still be present on the deck and the fishing gear  
297 and potentially cause noise through false positive detections in the subsequent sample site.  
298 Nevertheless, our results demonstrate that this source of bias is likely negligible: after filtering for  
299 basic contamination controls, we find that metabarcoding data mirror visual identifications, and the  
300 overall pattern of  $\beta$ -diversity reliably discriminates between hauls and depth strata, including sites  
301 with notable ecological features, such as the highly diverse bank at site B5.

302 The collection of slush samples is easy and quick (Fig. 1A), potentially providing a huge amount of  
303 data that could be collected by commercial fishing vessels operating across seas. Fishers are often the  
304 first to notice changes in marine assemblages (Bradley et al. 2019), so fishing vessels, combined with  
305 cutting-edge technology (including satellite-based tracking and electronic monitoring) are  
306 increasingly touted as potential scientific platforms not only for collecting necessary data for stock  
307 assessment but also for biodiversity data recording. The present study suggests that slush collection  
308 and storage would be a valuable low-effort task that could be carried out by most trawlers, across vast  
309 marine areas and in different seasons. This approach could be used to investigate species distribution  
310 across the oceans and, consequently, to assess species richness patterns, the spread of invasive  
311 species, and the loss of threatened and endangered species due to environmental change, ultimately  
312 providing a new tool to detect shifts in community composition (Jerde and Mahon 2015). If

313 judiciously coordinated, fishing vessels could form an unparalleled fleet of sentinels for monitoring  
314 marine life and their changes in response to local and global perturbations, with the added bonus of  
315 potentially engendering a greater sense of marine stewardship among the fishers.

316

### 317 *Acknowledgements and authors contributions*

318 TR, SM and SC conceived and designed the study; FDM, FF, GG and DS contributed to the general  
319 idea, draft the design of the sampling, and did fieldwork; FDM rinsed the samples; CB and GC  
320 performed laboratory experiments; TR, LT, GM, LDA and SF analysed data; TR, SM, LT and GM  
321 wrote the paper; all authors contributed revising the manuscript.

322

## References

- 323 Bertrand, J. A., L. G. De Sola, C. Papaconstantinou, G. Relini, and A. Souplet. 2002. The general  
324 specifications of the MEDITS surveys. *Scientia Marina* 66:9–17.
- 325 Boyer, F., C. Mercier, A. Bonin, Y. Le Bras, P. Taberlet, and E. Coissac. 2016. obitools: a unix-  
326 inspired software package for DNA metabarcoding. *Molecular Ecology Resources* 16:176–182.
- 327 Bradley, D., M. Merrifield, K. M. Miller, S. Lomonico, J. R. Wilson, and M. G. Gleason. 2019.  
328 Opportunities to improve fisheries management through innovative technology and advanced data  
329 systems. *Fish and Fisheries* 20:564–583.
- 330 Consoli, P., V. Esposito, P. Battaglia, C. Altobelli, P. Perzia, T. Romeo, S. Canese, and F. Andaloro.  
331 2016. Fish distribution and habitat complexity on banks of the strait of sicily (central mediterranean  
332 sea) from Remotely-Operated Vehicle (ROV) explorations. *PLoS ONE* 11:e0167809.
- 333 Dennis, D., É. Plagányi, I. Van Putten, T. Hutton, and S. Pascoe. 2015. Cost benefit of fishery-  
334 independent surveys: Are they worth the money? *Marine Policy* 58:108–115.
- 335 Djurhuus, A., K. Pitz, N. A. Sawaya, J. Rojas-Márquez, B. Michaud, E. Montes, F. Muller-Karger, and  
336 M. Breitbart. 2018. Evaluation of marine zooplankton community structure through environmental  
337 DNA metabarcoding. *Limnology and Oceanography: Methods* 16:209–221.
- 338 FAO. 2020. *The State of World Fisheries and Aquaculture 2020*. Rome.
- 339 Fonseca, V. G., G. R. Carvalho, W. Sung, H. F. Johnson, D. M. Power, S. P. Neill, M. Packer, M. L.

340 Blaxter, P. J. D. Lamshead, W. K. Thomas, and S. Creer. 2010. Second-generation environmental  
341 sequencing unmask marine metazoan biodiversity. *Nature Communications* 1.

342 Jackman, S., A. Tahk, A. Zeileis, C. Maimone, J. Fearon, and Z. Meers. 2020. *pscl: Classes and*  
343 *Methods for R Developed in the Political Science Computational Laboratory*, Stanford University.  
344 Cran.

345 Jerde, C. L., and A. R. Mahon. 2015. Improving confidence in environmental DNA species detection.  
346 *Molecular Ecology Resources* 15:461–463.

347 Kraan, M., S. Uhlmann, J. Steenbergen, A. T. M. Van Helmond, and L. Van Hoof. 2013. The optimal  
348 process of self-sampling in fisheries: Lessons learned in the Netherlands. *Journal of Fish Biology*  
349 83:963–973.

350 Lamb, P. D., E. Hunter, J. K. Pinnegar, S. Creer, R. G. Davies, and M. I. Taylor. 2019. How  
351 quantitative is metabarcoding: A meta-analytical approach. *Molecular Ecology* 28:420–430.

352 Martin, T. G., B. A. Wintle, J. R. Rhodes, P. M. Kuhnert, S. A. Field, S. J. Low-Choy, A. J. Tyre, and  
353 H. P. Possingham. 2005. Zero tolerance ecology: Improving ecological inference by modelling the  
354 source of zero observations. *Ecology Letters* 8:1235–1246.

355 McInnes, J. C., R. Alderman, M.-A. Lea, B. Raymond, B. E. Deagle, R. A. Phillips, A. Stanworth, D.  
356 R. Thompson, P. Catry, H. Weimerskirch, C. G. Suazo, M. Gras, and S. N. Jarman. 2017. High  
357 occurrence of jellyfish predation by black-browed and Campbell albatross identified by DNA  
358 metabarcoding. *Molecular Ecology* 26:4831–4845.

359 Oksanen, J., F. G. Blanchet, M. Friendly, R. Kindt, P. Legendre, D. McGlenn, P. R. Minchin, R. B.  
360 O’Hara, G. L. Simpson, P. Solymos, M. H. H. Stevens, E. Szoecs, and H. Wagner. 2018. *vegan:*  
361 *Community Ecology Package*. Ordination methods, diversity analysis and other functions for  
362 community and vegetation ecologists.

363 Pauly, D., and D. Zeller. 2016. Catch reconstructions reveal that global marine fisheries catches are  
364 higher than reported and declining. *Nature Communications* 7:1–9.

365 Plet-Hansen, K. S., H. Bergsson, and C. Ulrich. 2019. More data for the money: Improvements in  
366 design and cost efficiency of electronic monitoring in the Danish cod catch quota management trial.  
367 *Fisheries Research* 215:114–122.

- 368 Russo, T., L. D'Andrea, S. Franceschini, P. Accadia, A. Cucco, G. Garofalo, M. Gristina, A. Parisi, G.  
369 Quattrocchi, R. F. Sabatella, M. Sinerchia, D. M. Canu, S. Cataudella, and F. Fiorentino. 2019.  
370 Simulating the Effects of Alternative Management Measures of Trawl Fisheries in the Central  
371 Mediterranean Sea: Application of a Multi-Species Bio-economic Modeling Approach. *Frontiers in*  
372 *Marine Science* 6:1–23.
- 373 Sampson, D. B. 2011. The accuracy of self-reported fisheries data: Oregon trawl logbook fishing  
374 locations and retained catches. *Fisheries Research* 112:59–76.
- 375 Schnell, I. B., and K. Bohmann. 2015. Tag jumps illuminated-reducing sequence-to-sample  
376 misidentifications in metabarcoding studies. *Wiley Online Library* 15:1289–1303.
- 377 Seebens, H., N. Schwartz, P. J. Schupp, and B. Blasius. 2016. Predicting the spread of marine species  
378 introduced by global shipping. *Proceedings of the National Academy of Sciences of the United States*  
379 *of America* 113:5646–5651.
- 380 Sellers, G. S., C. Di Muri, A. Gómez, and B. Hänfling. 2018. Mu-DNA: a modular universal DNA  
381 extraction method adaptable for a wide range of sample types. *Metabarcoding and Metagenomics*  
382 2:e24556.
- 383 Siegenthaler, A., O. S. Wangensteen, C. Benvenuto, J. Campos, and S. Mariani. 2019. DNA  
384 metabarcoding unveils multiscale trophic variation in a widespread coastal opportunist. *Molecular*  
385 *Ecology* 28:232–249.
- 386 Spens, J., A. R. Evans, D. Halfmaerten, S. W. Knudsen, M. E. Sengupta, S. S. T. Mak, E. E. Sigsgaard,  
387 and M. Hellström. 2017. Comparison of capture and storage methods for aqueous microbial eDNA  
388 using an optimized extraction protocol: advantage of enclosed filter. *Methods in Ecology and*  
389 *Evolution* 8:635–645.
- 390 Stat, M., J. John, J. D. DiBattista, S. J. Newman, M. Bunce, and E. S. Harvey. 2019. Combined use of  
391 eDNA metabarcoding and video surveillance for the assessment of fish biodiversity. *Conservation*  
392 *Biology* 33:196–205.
- 393 Taberlet, P., A. Bonin, E. Coissac, and L. Zinger. 2018. *Environmental DNA: For Biodiversity*  
394 *Research and Monitoring*.
- 395 Thomsen, P. F., J. Kielgast, L. L. Iversen, P. R. Møller, M. Rasmussen, and E. Willerslev. 2012.



396 Detection of a Diverse Marine Fish Fauna Using Environmental DNA from Seawater Samples. PLoS  
397 ONE 7:e41732.

398 Thomsen, P. F., P. R. Møller, E. E. Sigsgaard, S. W. Knudsen, O. A. Jørgensen, and E. Willerslev.  
399 2016. Environmental DNA from seawater samples correlate with trawl catches of subarctic,  
400 deepwater fishes. PLoS ONE 11:e0165252.

401 Vilas, C., L. T. Antelo, F. Martin-Rodriguez, X. Morales, R. I. Perez-Martin, A. A. Alonso, J. Valeiras,  
402 E. Abad, M. Quinzan, and M. Barral-Martinez. 2019. Use of computer vision onboard fishing vessels  
403 to quantify catches: The iObserver. Marine Policy:103714.

404 Wangensteen, O. S., C. Palacín, M. Guardiola, and X. Turon. 2018. DNA metabarcoding of littoral  
405 hardbottom communities: High diversity and database gaps revealed by two molecular markers.  
406 PeerJ 2018:e4705.

407 Worm, B., and T. A. Branch. 2012. The future of fish. Trends in Ecology and Evolution 27:594–599.

408

409

## Figure captions

### 410 *Figure 1*

411 Sampling of water draining from net cod-end and study technical procedures: (A) collection of water  
412 at the end of the hauling phase; (B) Maps identifying the sampling locations along the southern coast  
413 of Sicily, Mediterranean Sea; (C) Graphical schematic illustrating the key analytical steps: fieldwork,  
414 laboratory, bioinformatics and data analyses. Colours of slush samples refer to those in Figure 3  
415 (according to their depth stratum).

### 416 *Figure 2*

417 Venn diagram of species and families detected via metabarcoding of DNA in the slush and catch.  
418 Taxa identified using the 12S marker and COI markers are combined. Drawings were reproduced  
419 with permission of FAO Copyright Office (FAO 2017), with some exception (see [Table S3](#)).

### 420 *Figure 3*

421 Pattern of species composition from visual sorting of survey catches and DNA sequences (12S and  
422 COI) retrieved from slush samples (six replicates per site), as returned by a Multidimensional scaling  
423 (NMDS) based on Jaccard's distance. Samples are grouped by sampling locations into convex hulls  
424 coloured according to the corresponding depth layer and labelled according to the sampling station.  
425 A) NMDS performed on the whole dataset (125 species); B) NMDS performed on restricted dataset  
426 (58 species present in both slush and catch).

### 427 *Figure 4*

428 Scatterplot of observed (in the slush) and predicted (by the fitted zero-inflated models)  $\text{Log}_{10}$ -  
429 transformed number of reads by species and site, for 12S and COI datasets. Points density is  
430 represented by hexagons coloured according to the scale on the right side of each plot. Linear  
431 regressions (with standard errors and corresponding adjusted  $R^2$  values), fitted on positive values, are  
432 also presented.

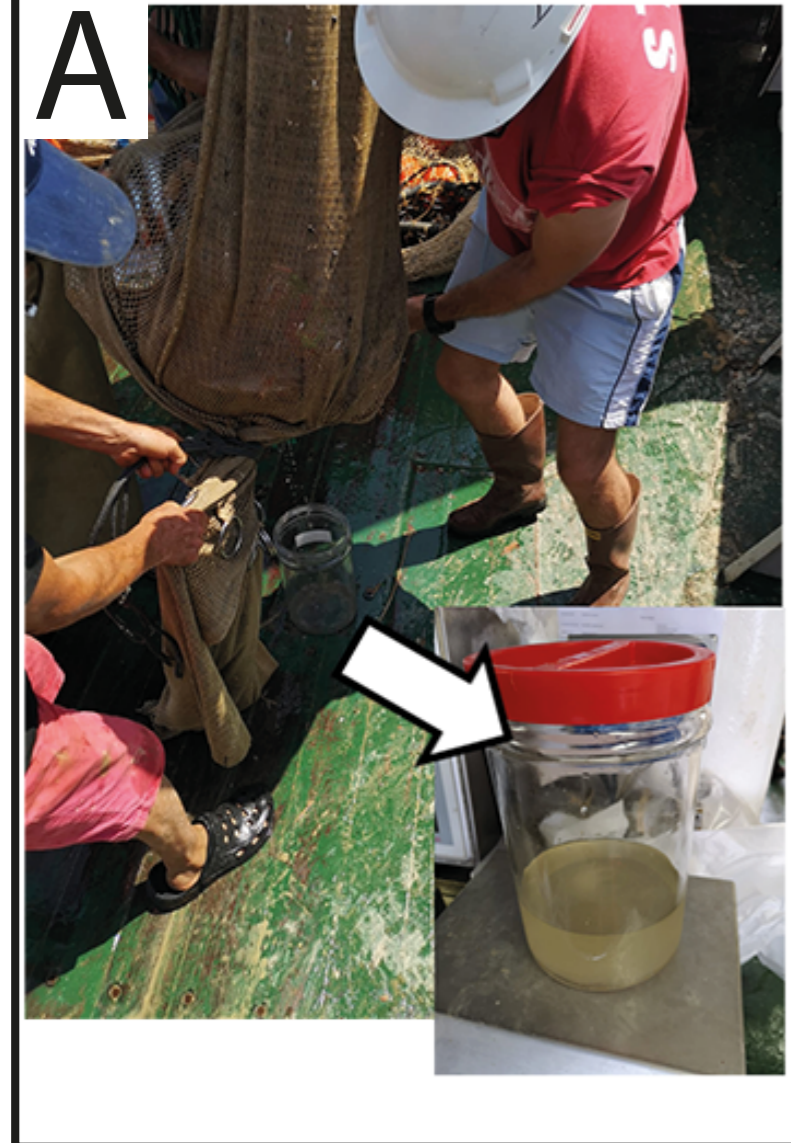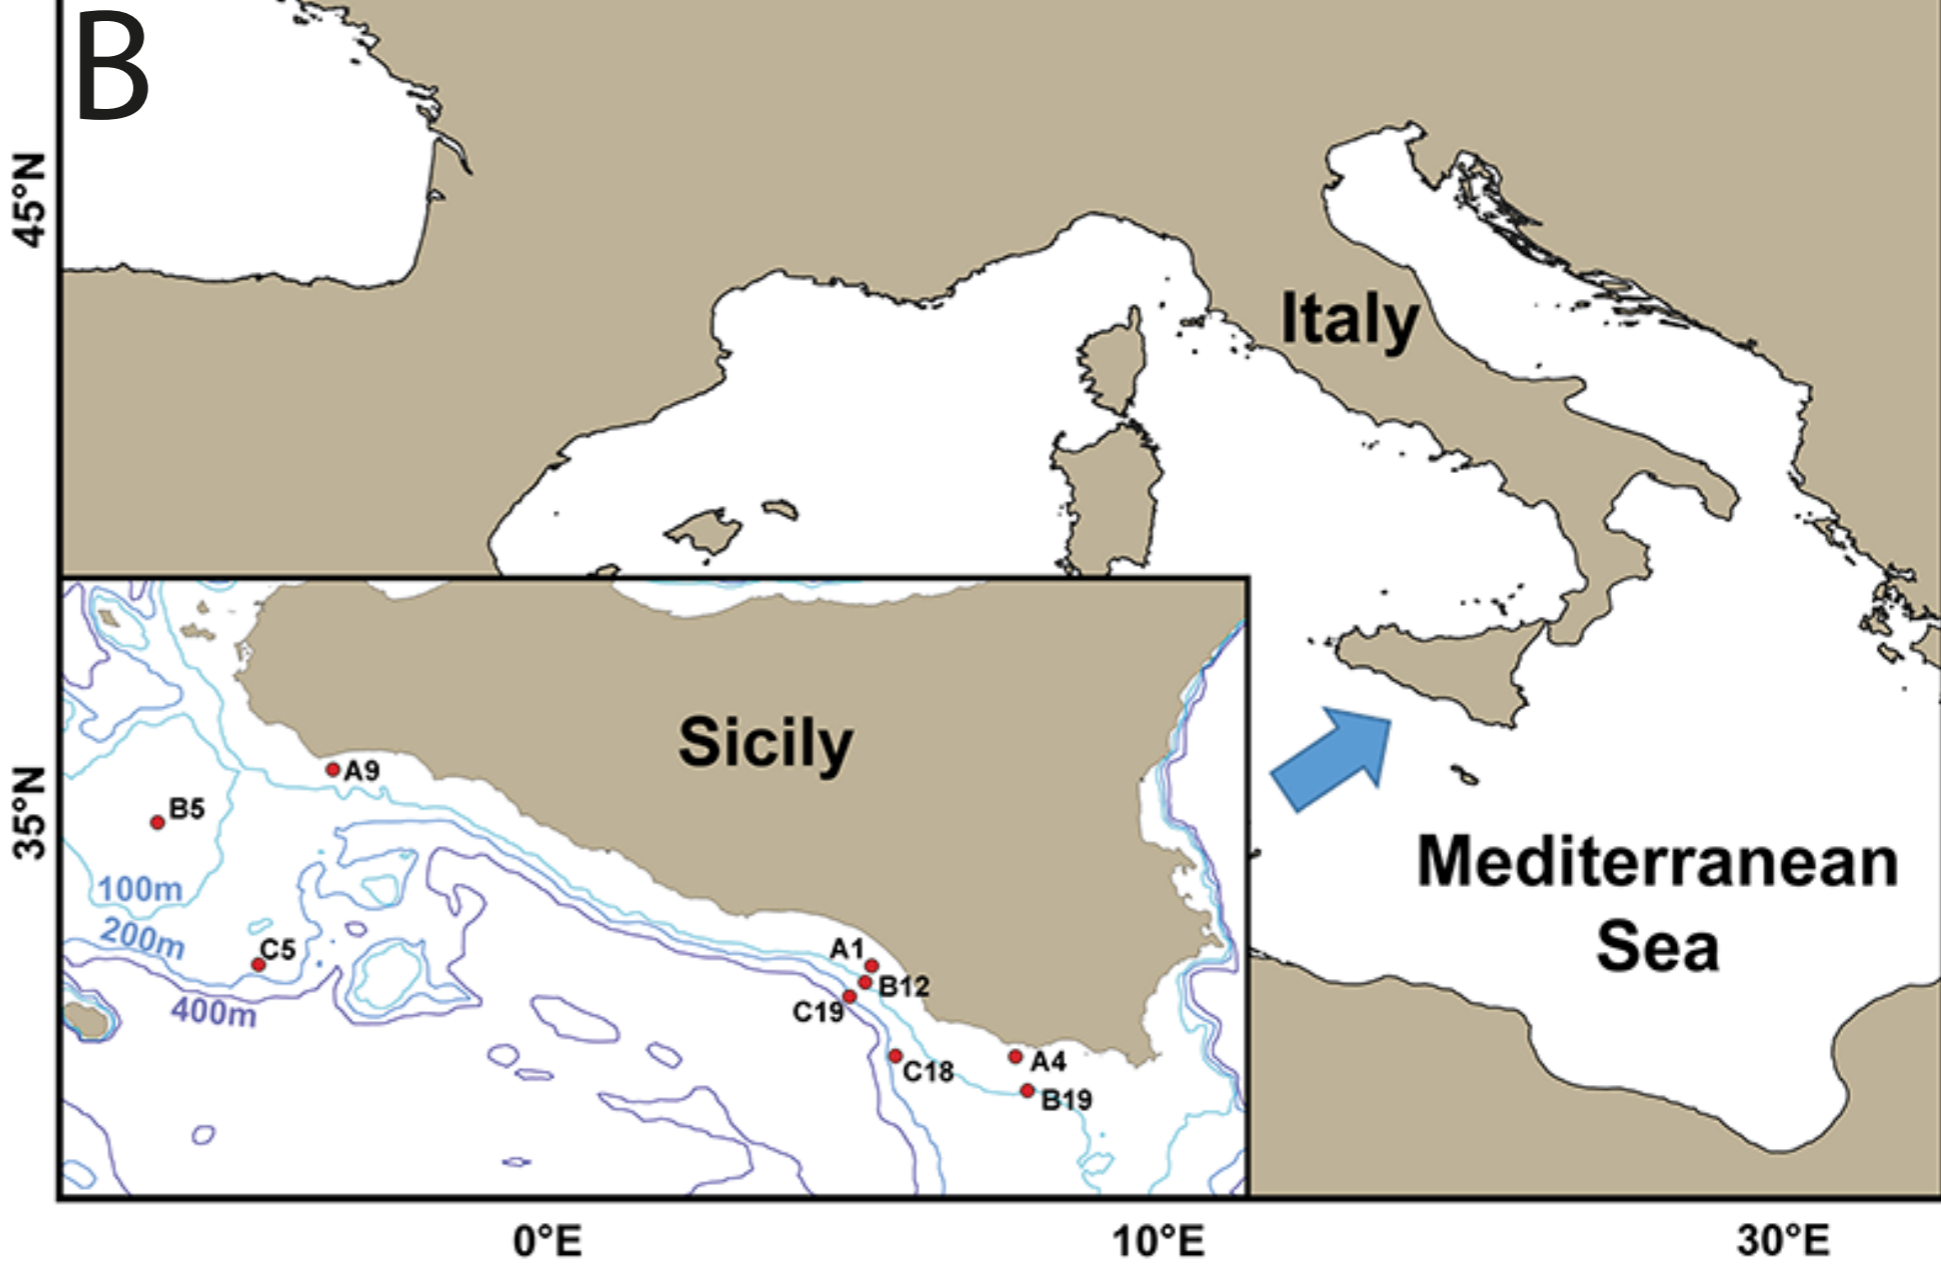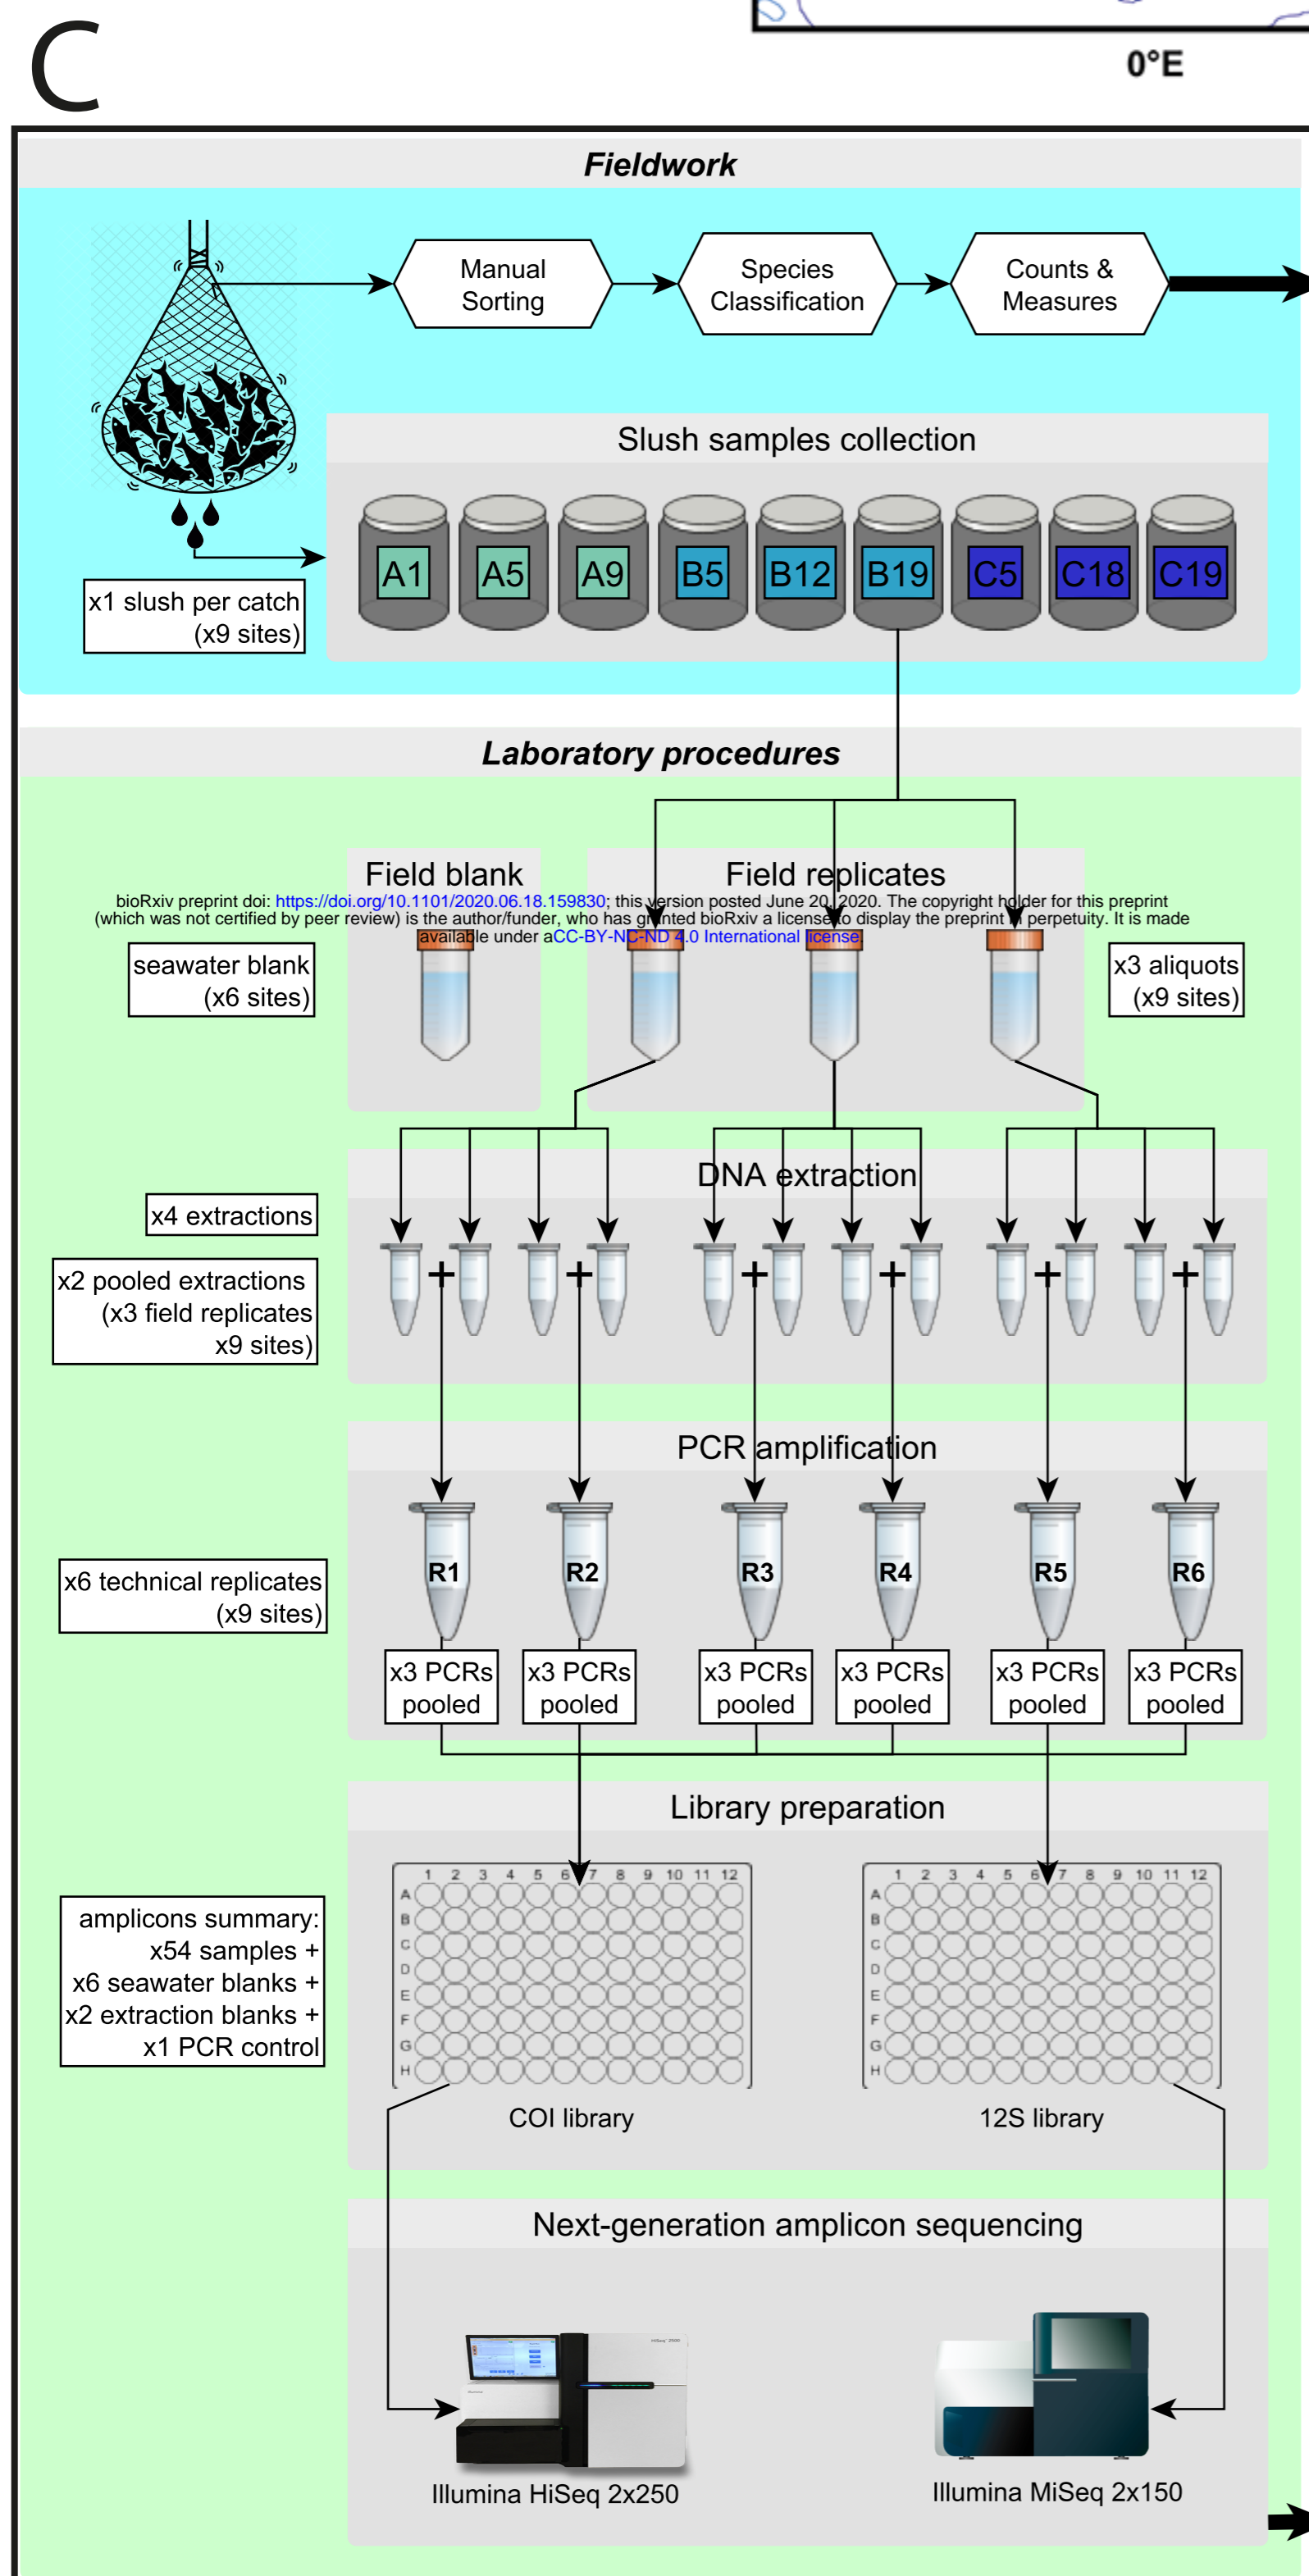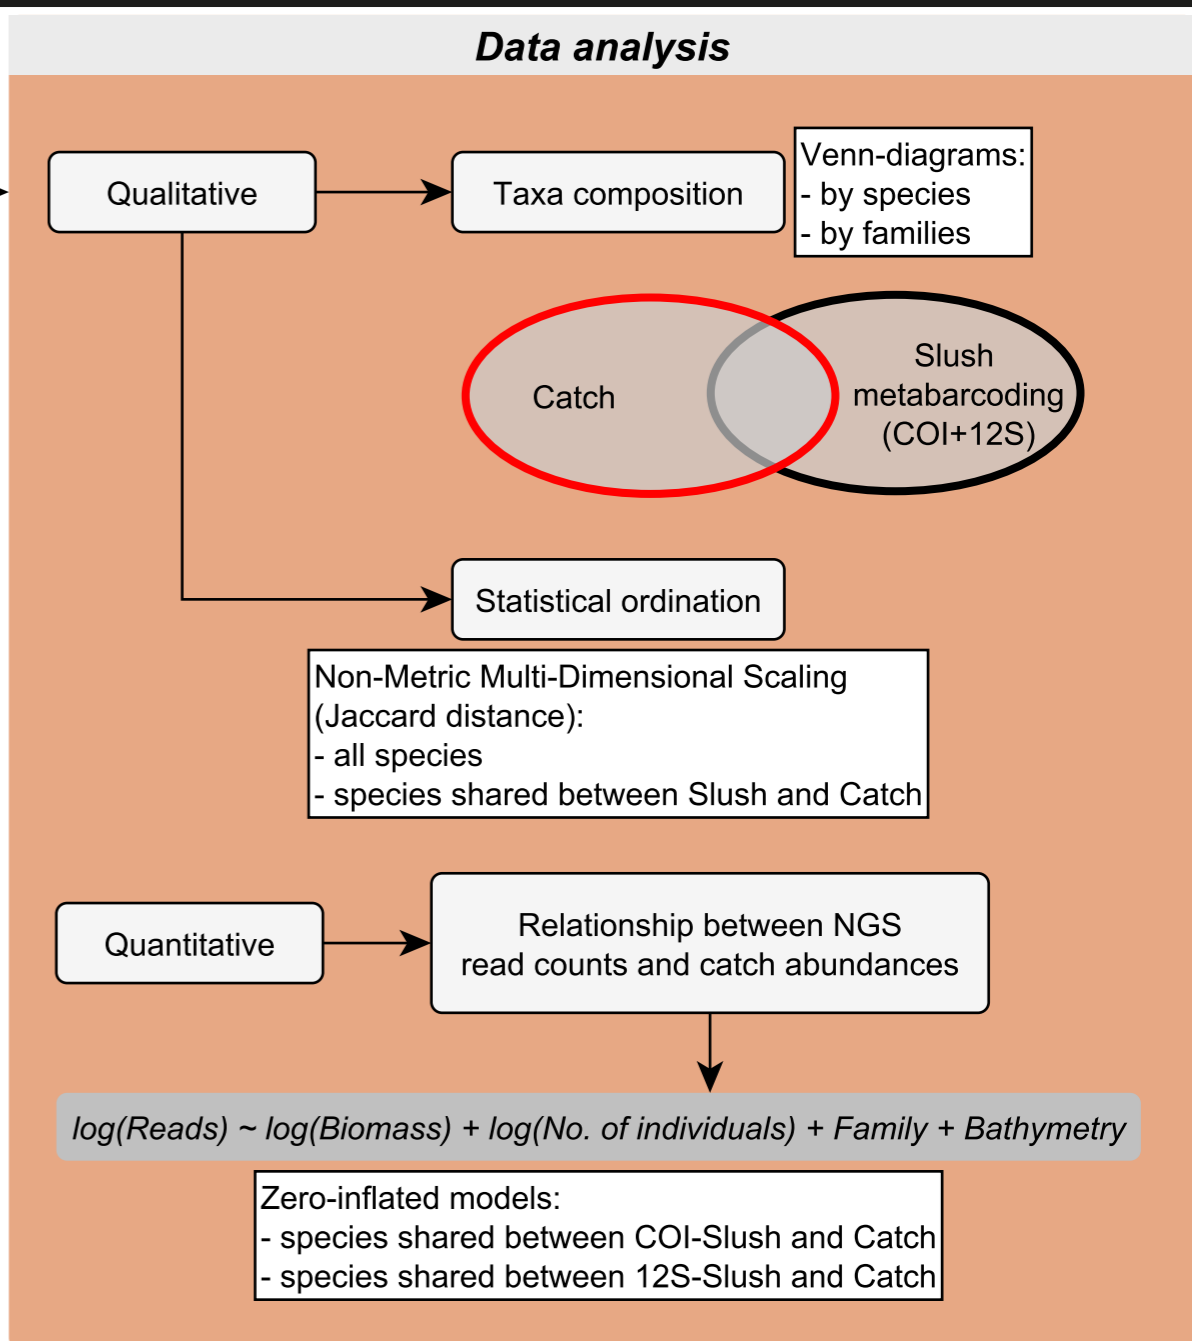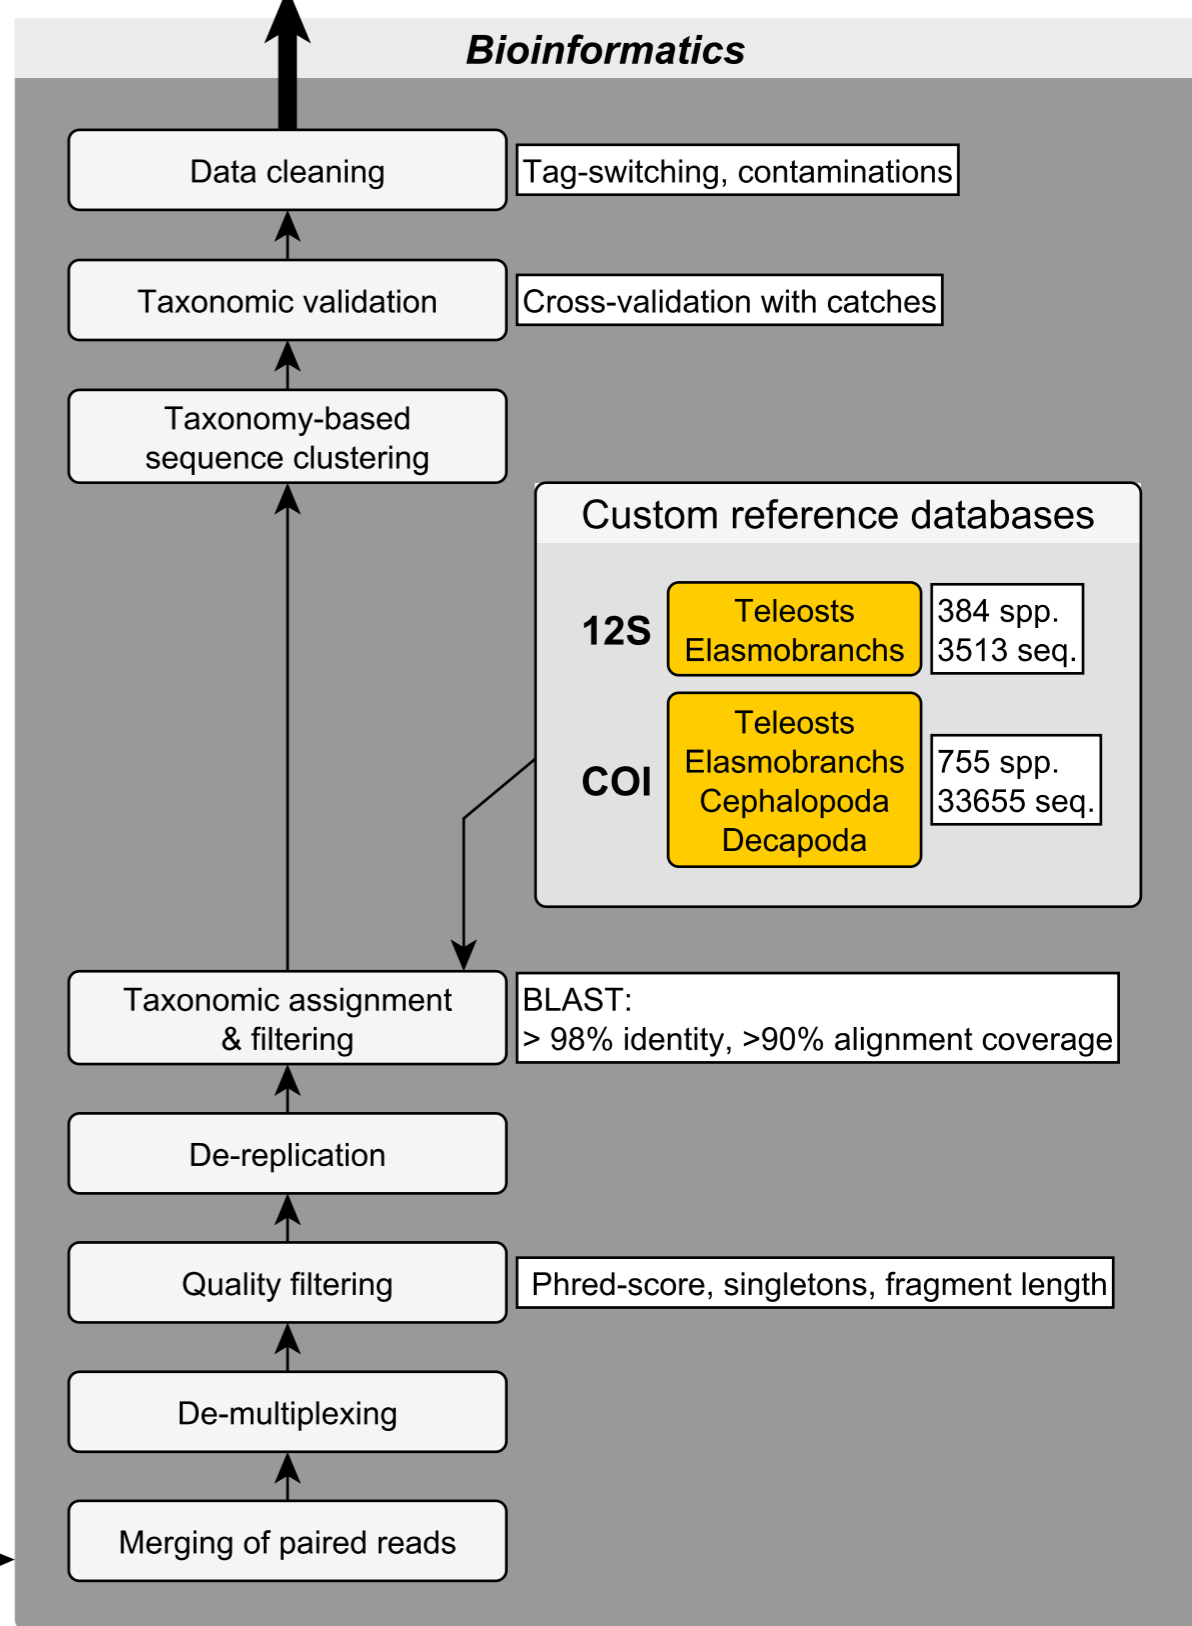

# Species

# Family

Catch

Slush

## Teleosts (N=72)

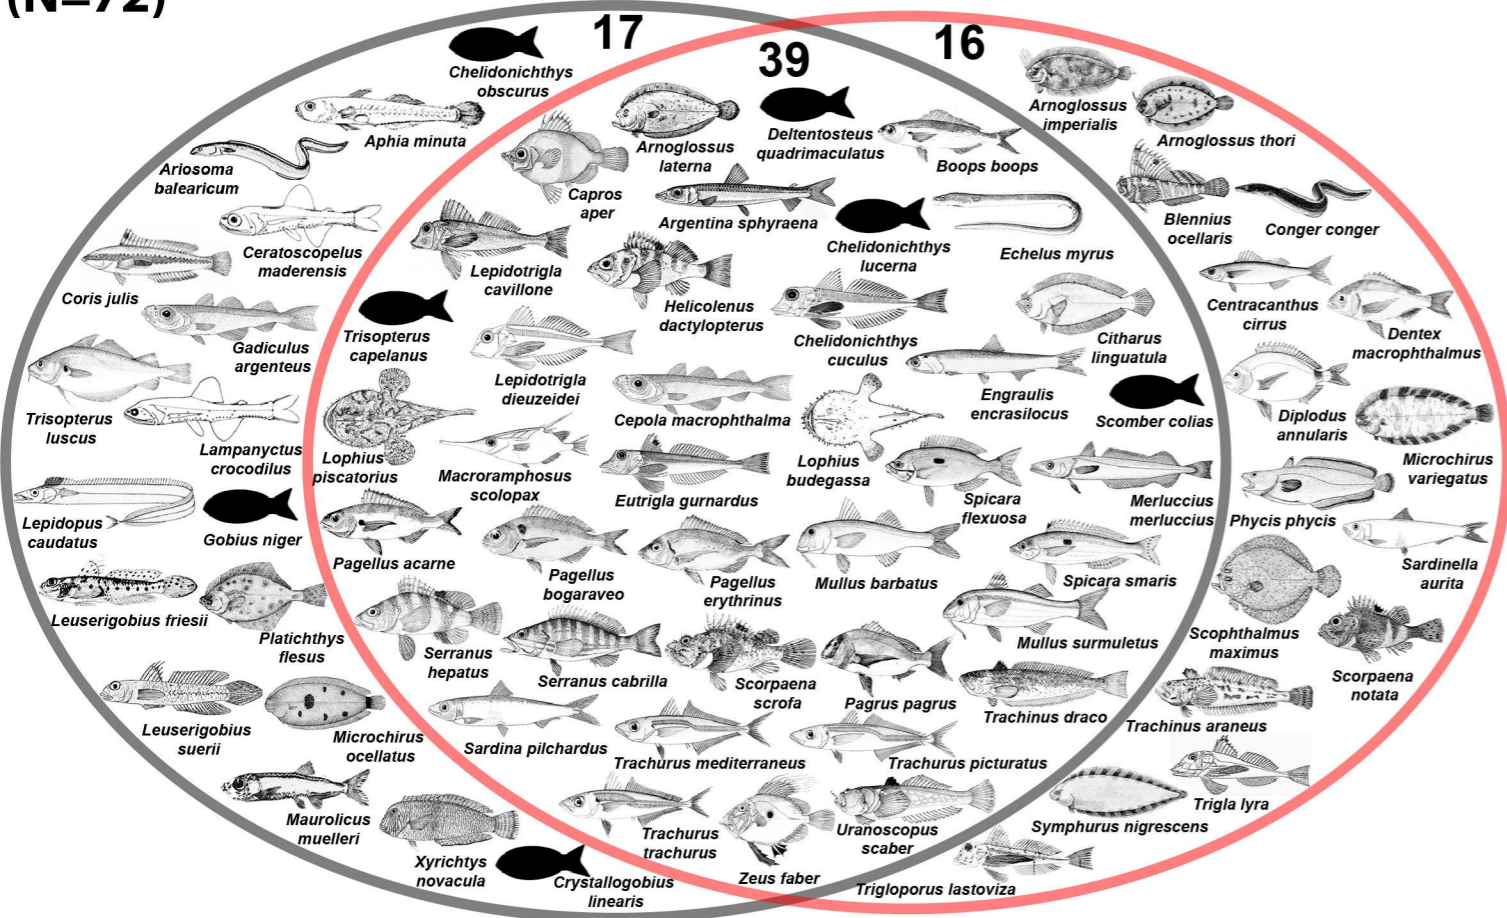

## Teleosts (N=36)

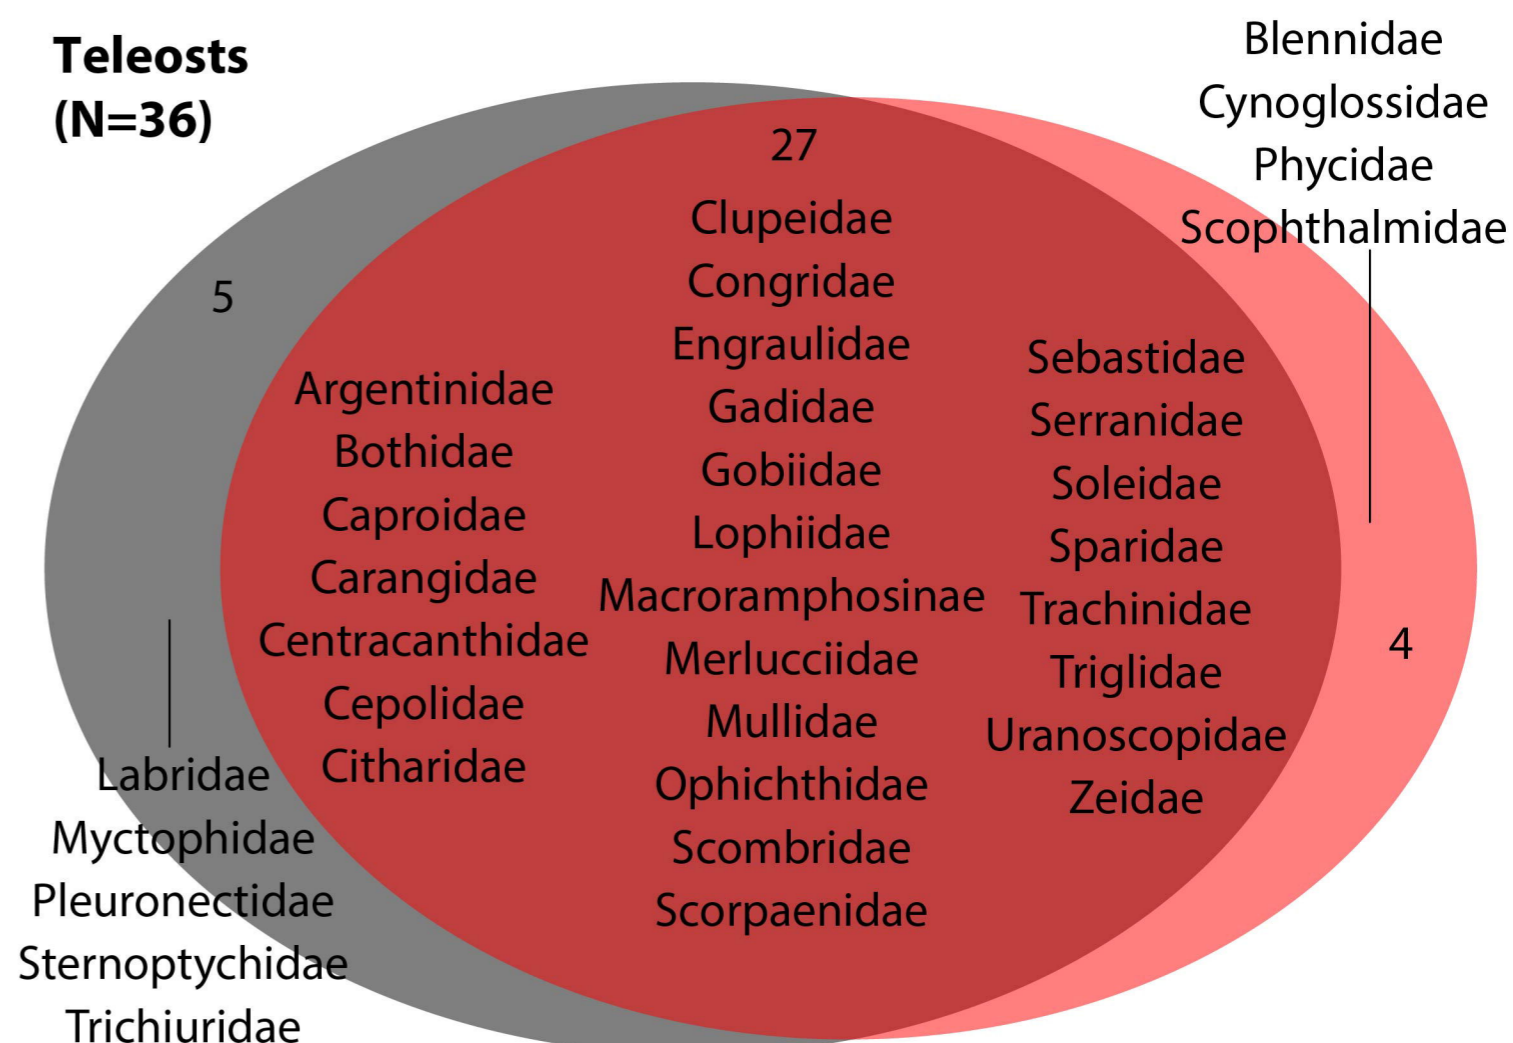

## Elasmobranchs (N=16)

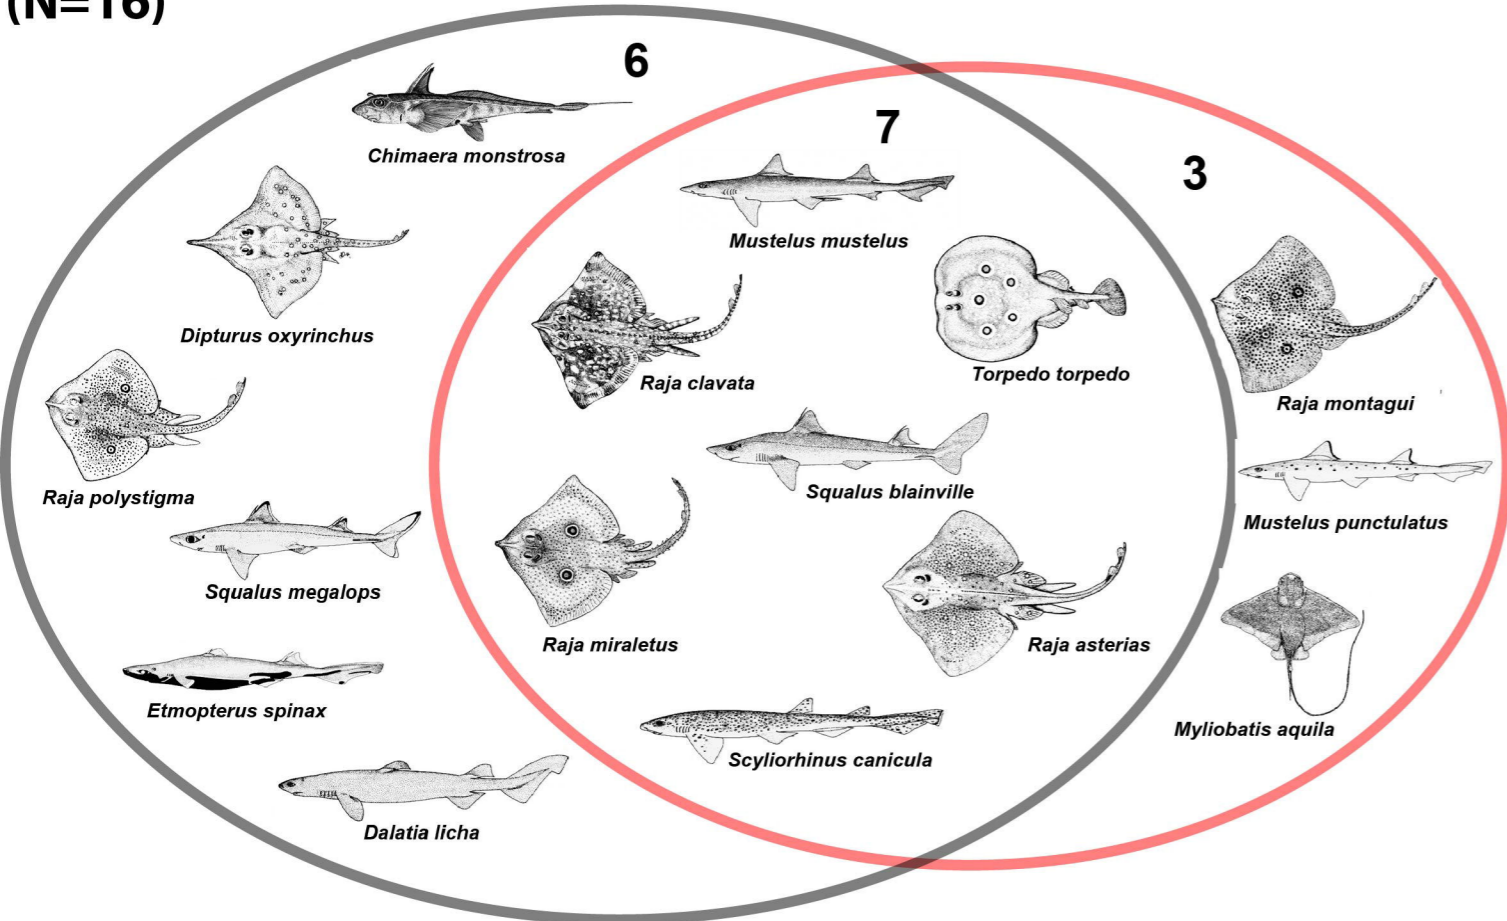

## Elasmobranchs (N=9)

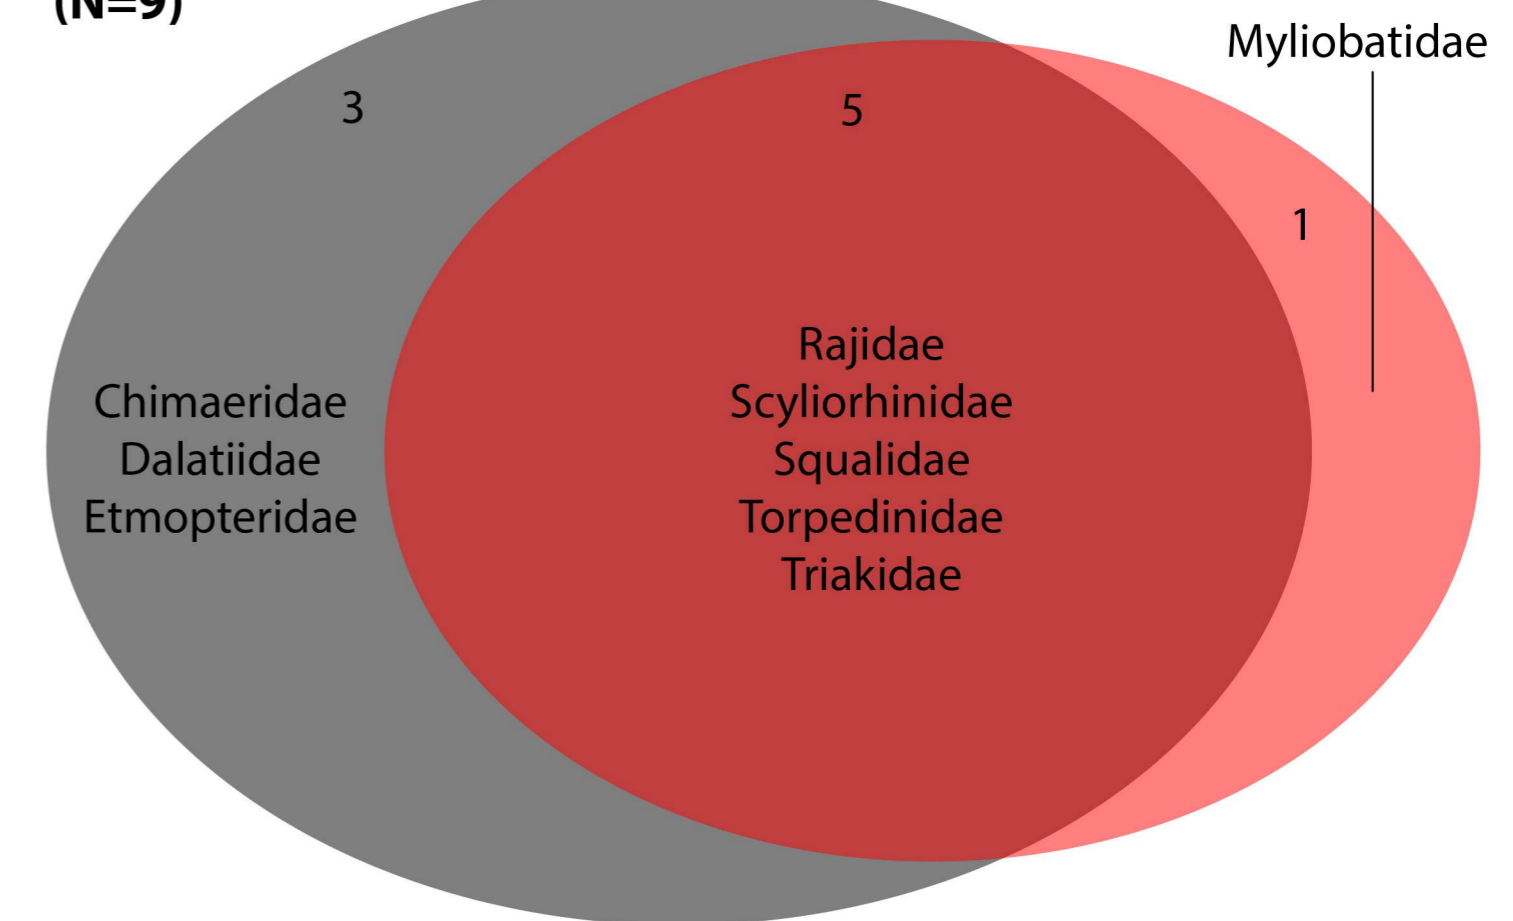

## Cephalopoda (N=18)

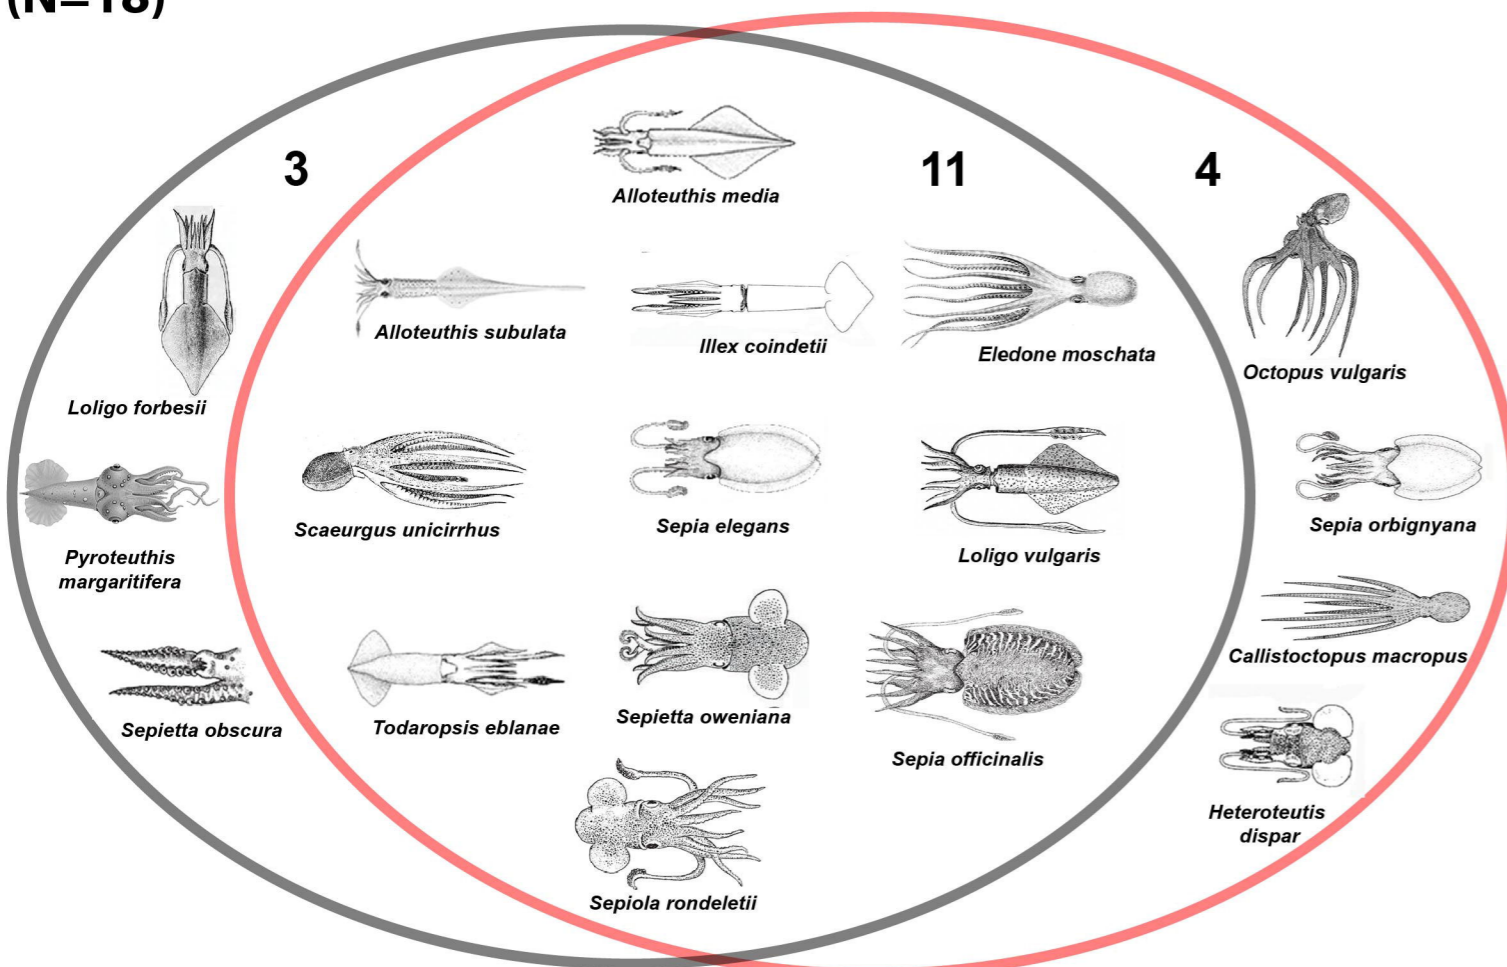

## Cephalopoda (N=7)

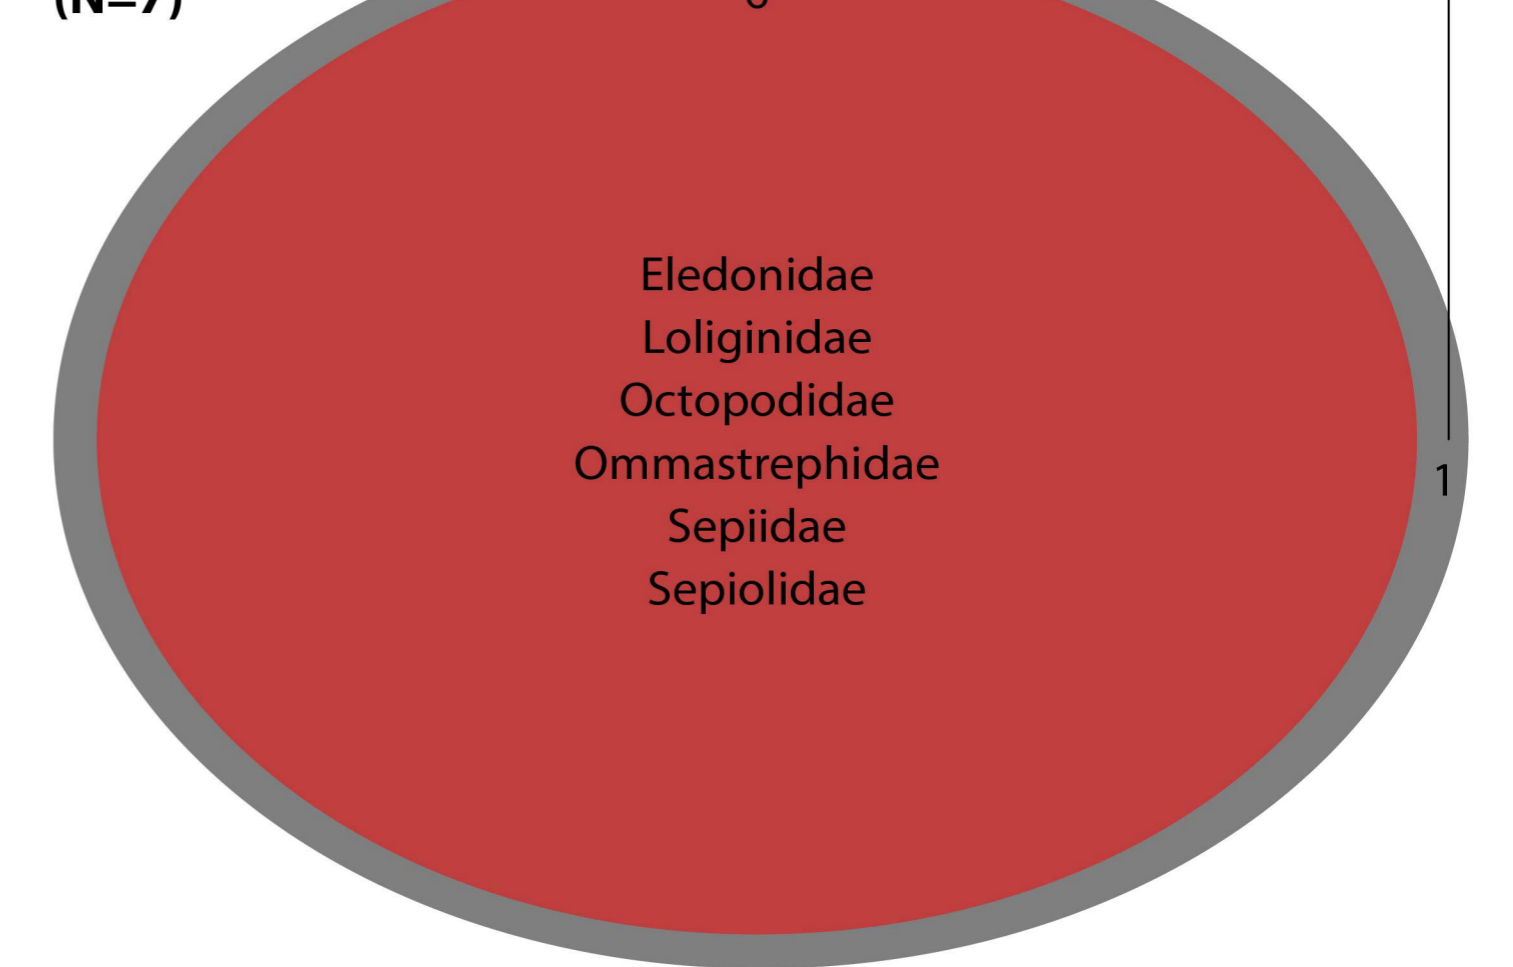

## Crustacea (N=18)

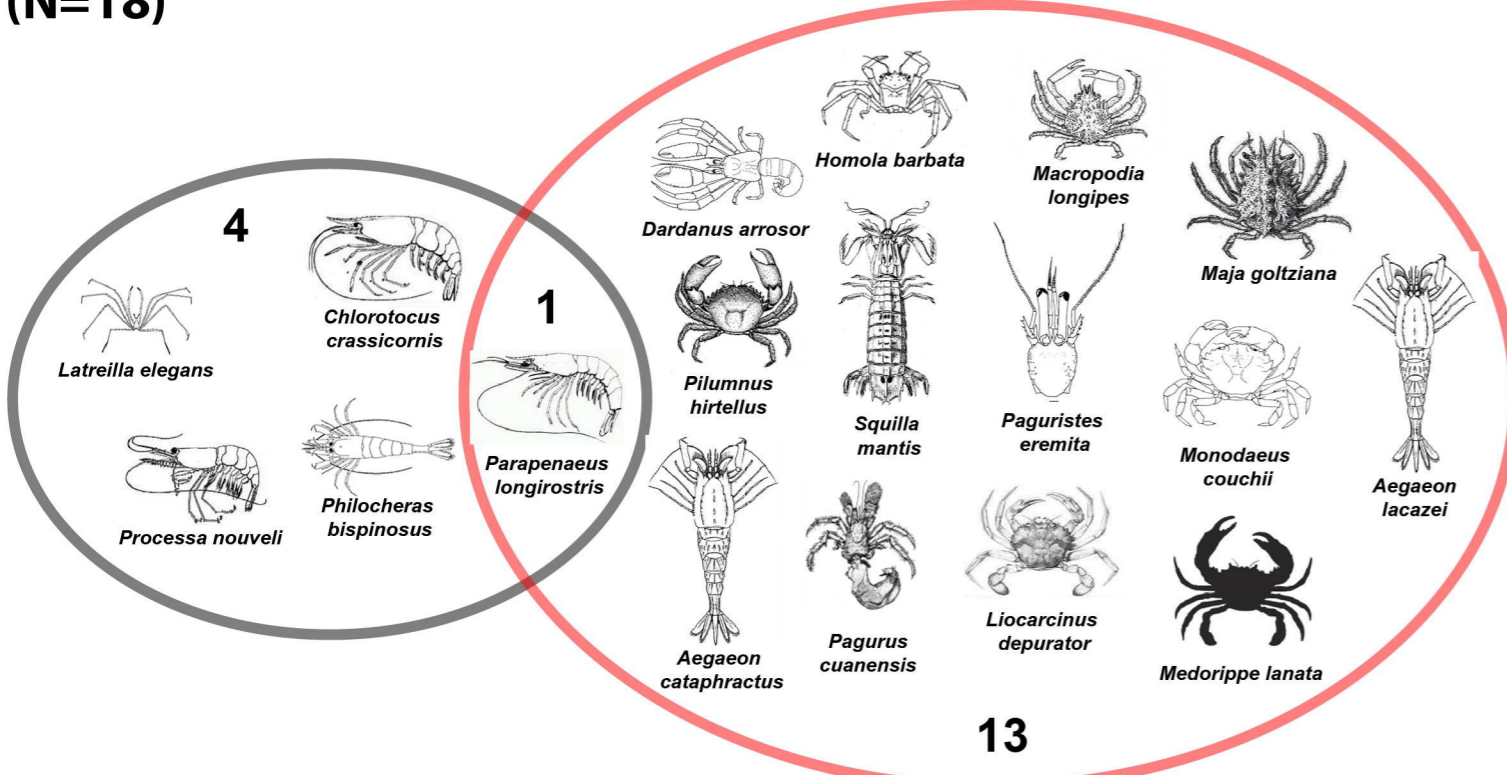

## Crustacea (N=15)

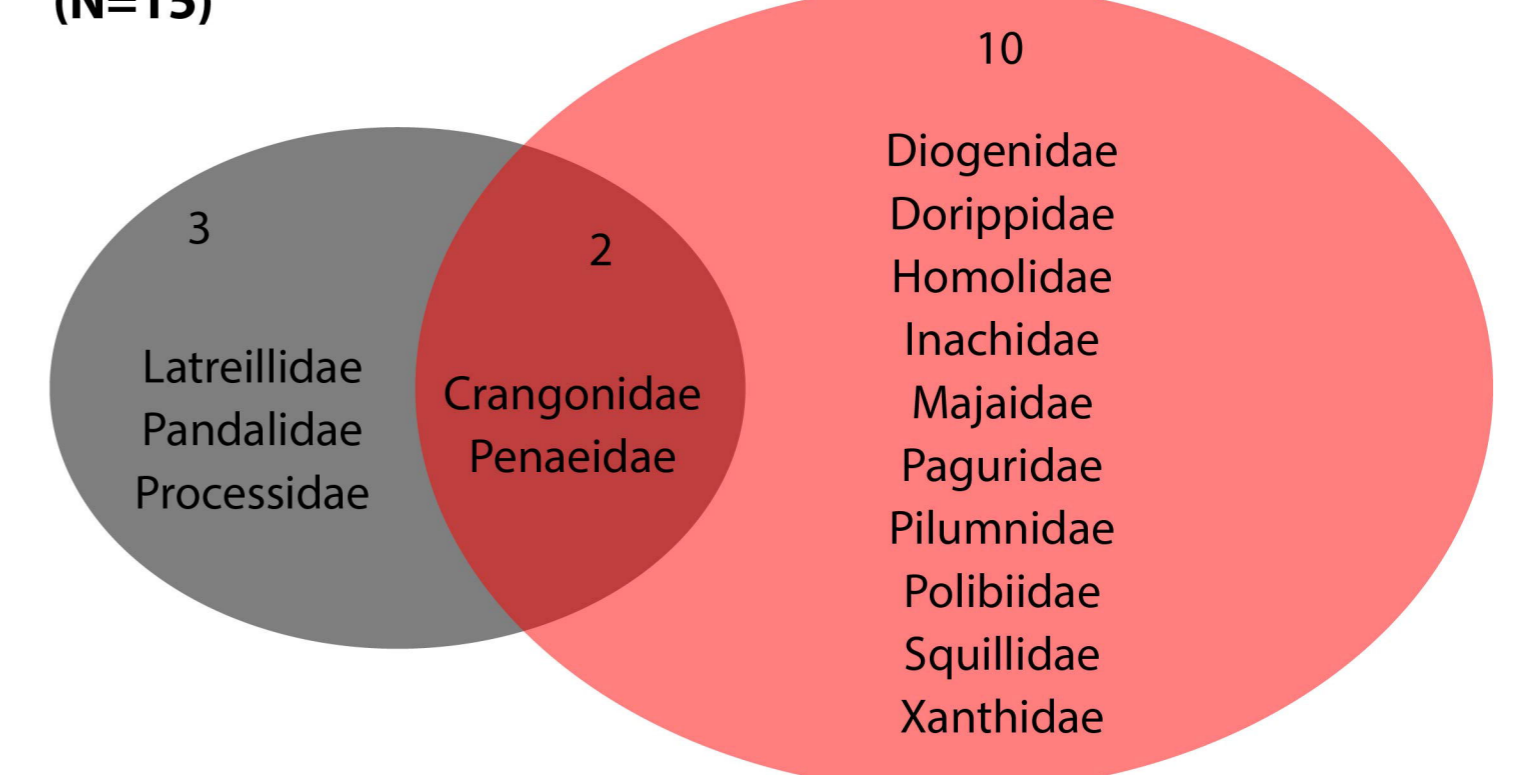

bioRxiv preprint doi: <https://doi.org/10.1101/2020.06.18.159830>; this version posted June 20, 2020. The copyright holder for this preprint (which was not certified by peer review) is the author/funder, who has granted bioRxiv a license to display the preprint in perpetuity. It is made available under aCC-BY-NC-ND 4.0 International license.

**A**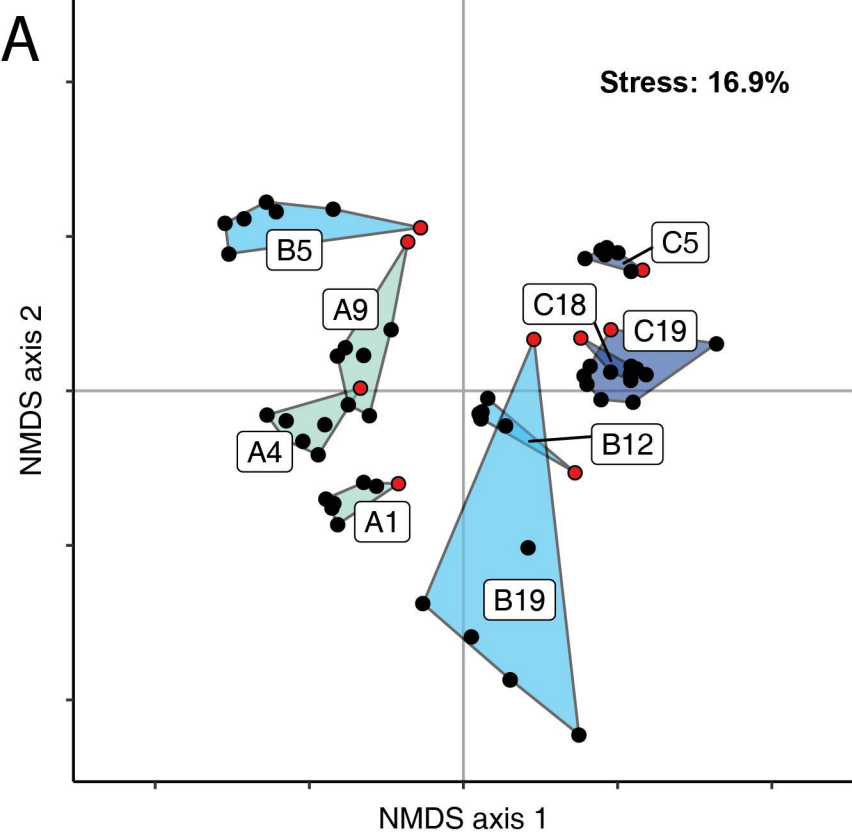**B**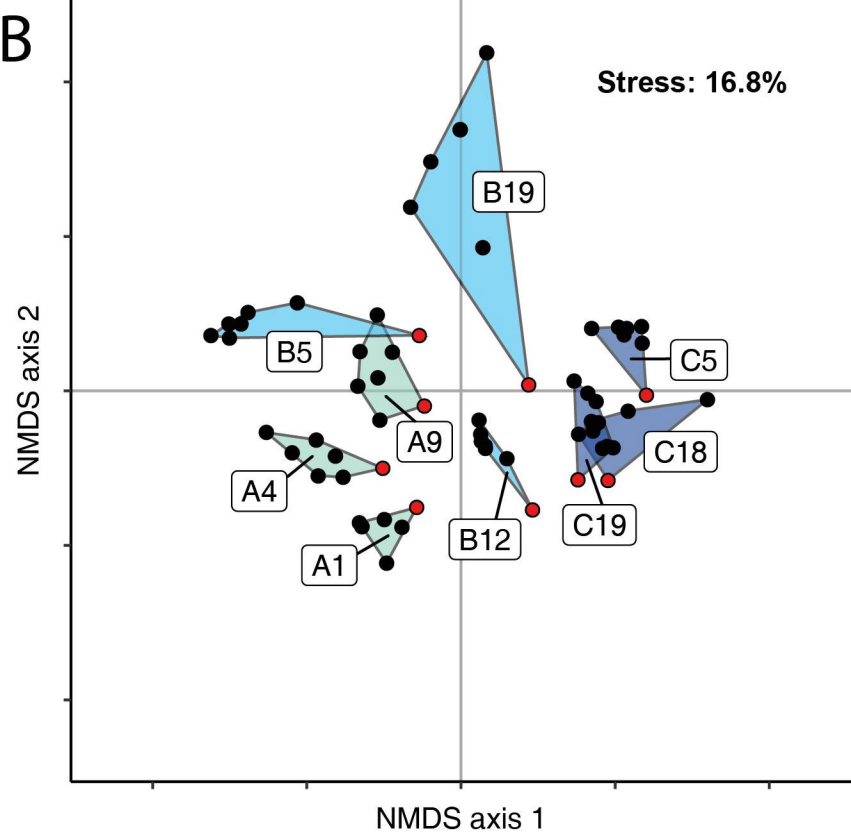

**12S**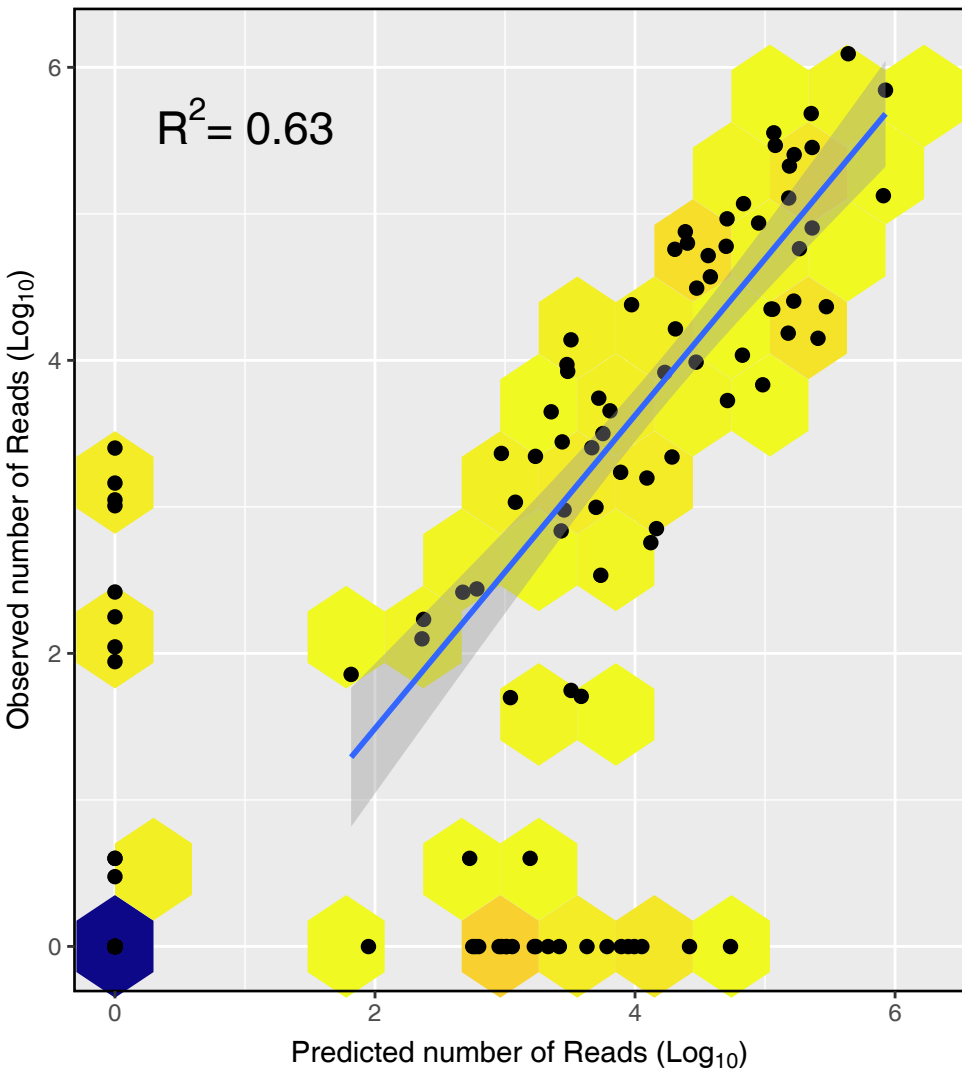**COI**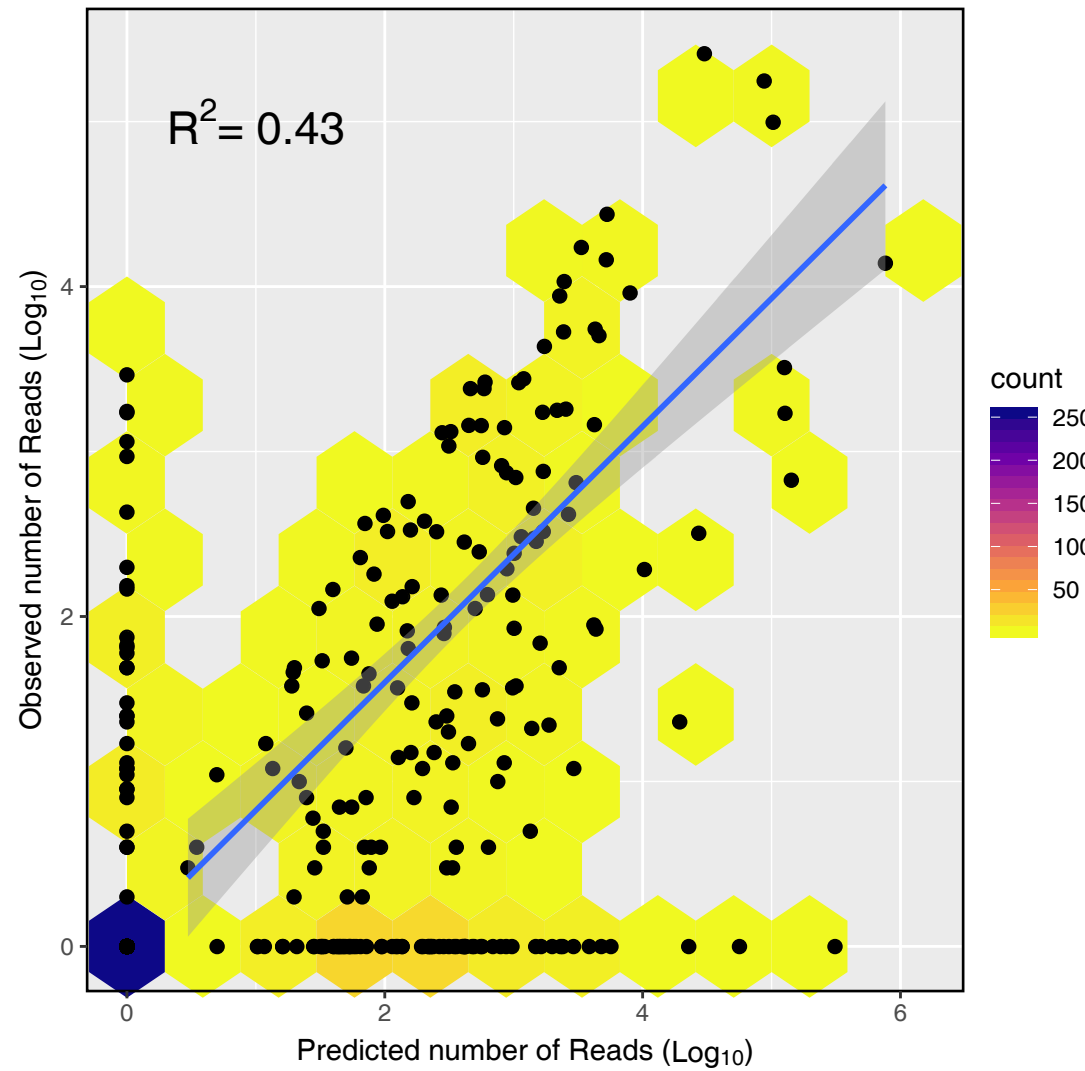

Source: https://www.biorxiv.org/content/biorxiv/early/2020/06/20/2020.06.18.159830.full.pdf
